# Supplementary material for: Genomic surveillance of SARS-CoV-2 Spike gene by sanger sequencing
Source: PubMed Central journal article supplement (PMC8775319; doi:10.1371/journal.pone.0262170), 2022-01-20
Supplement: pone.0262170.s002.pdf [file pone.0262170.s002.pdf]

S2 File. Map of primer pairs in VOCs sequences.

|            | 10          | 20          | 30          | 40          | 50          |
|------------|-------------|-------------|-------------|-------------|-------------|
| Wuhan-Hu-1 | ..... ..... | ..... ..... | ..... ..... | ..... ..... | ..... ..... |
| B.1.1.7    | ATGTTTGTTT  | TTCTTGTTTT  | ATTGCCACTA  | GTCTCTAGTC  | AGTGTGTTAA  |
| B.1.351    | ATGTTTGTTT  | TTCTTGTTTT  | ATTGCCACTA  | GTCTCTAGTC  | AGTGTGTTAA  |
| P.1        | ATGTTTGTTT  | TTCTTGTTTT  | ATTGCCACTA  | GTCTCTAGTC  | AGTGTGTTAA  |
| B.1.617    | ATGTTTGTTT  | TTCTTGTTTT  | ATTGCCACTA  | GTCTCTAGTC  | AGTGTGTTAA  |
| PRIMER 1F  | -GTTTGTTT   | TTCTTGTTTT  | ATT-----    | -----       | -----       |
| PRIMER 1R  | -----       | -----       | -----       | -----       | -----       |
| PRIMER 2F  | -----       | -----       | -----       | -----       | -----       |
| PRIMER 2R  | -----       | -----       | -----       | -----       | -----       |
| PRIMER 3F  | -----       | -----       | -----       | -----       | -----       |
| PRIMER 3R  | -----       | -----       | -----       | -----       | -----       |
| PRIMER 4F  | -----       | -----       | -----       | -----       | -----       |
| PRIMER 4R  | -----       | -----       | -----       | -----       | -----       |
| PRIMER 5F  | -----       | -----       | -----       | -----       | -----       |
| PRIMER 5R  | -----       | -----       | -----       | -----       | -----       |
| PRIMER 6F  | -----       | -----       | -----       | -----       | -----       |
| PRIMER 6R  | -----       | -----       | -----       | -----       | -----       |
| PRIMER 7R  | -----       | -----       | -----       | -----       | -----       |
| PRIMER 8F  | -----       | -----       | -----       | -----       | -----       |

|            | 60          | 70          | 80          | 90          | 100         |
|------------|-------------|-------------|-------------|-------------|-------------|
| Wuhan-Hu-1 | ..... ..... | ..... ..... | ..... ..... | ..... ..... | ..... ..... |
| B.1.1.7    | TCTTACAACC  | AGAACTCAAT  | TACCCCTGTC  | ATACACTAAT  | TCTTTCACAC  |
| B.1.351    | TCTTACAACC  | AGAACTCAAT  | TACCCCTGTC  | ATACACTAAT  | TCTTTCACAC  |
| P.1        | TTTTACAAC   | AGAACTCAAT  | TACCCCTGTC  | ATACACTAAT  | TCTTTCACAC  |
| B.1.617    | TCTTAGAACC  | AGAACTCAAT  | TACCCCTGTC  | ATACACTAAT  | TCTTTCACAC  |
| PRIMER 1F  | -----       | -----       | -----       | -----       | -----       |
| PRIMER 1R  | -----       | -----       | -----       | -----       | -----       |
| PRIMER 2F  | -----       | -----       | -----       | -----       | -----       |
| PRIMER 2R  | -----       | -----       | -----       | -----       | -----       |
| PRIMER 3F  | -----       | -----       | -----       | -----       | -----       |
| PRIMER 3R  | -----       | -----       | -----       | -----       | -----       |
| PRIMER 4F  | -----       | -----       | -----       | -----       | -----       |
| PRIMER 4R  | -----       | -----       | -----       | -----       | -----       |
| PRIMER 5F  | -----       | -----       | -----       | -----       | -----       |
| PRIMER 5R  | -----       | -----       | -----       | -----       | -----       |
| PRIMER 6F  | -----       | -----       | -----       | -----       | -----       |
| PRIMER 6R  | -----       | -----       | -----       | -----       | -----       |
| PRIMER 7R  | -----       | -----       | -----       | -----       | -----       |
| PRIMER 8F  | -----       | -----       | -----       | -----       | -----       |

|            | 110         | 120         | 130         | 140         | 150         |
|------------|-------------|-------------|-------------|-------------|-------------|
| Wuhan-Hu-1 | ..... ..... | ..... ..... | ..... ..... | ..... ..... | ..... ..... |
| B.1.1.7    | GTTGGTGTTTA | TTACCCTGAC  | AAAGTTTTCA  | GATCCTCAGT  | TTTACATTCA  |
| B.1.351    | GTTGGTGTTTA | TTACCCTGAC  | AAAGTTTTCA  | GATCCTCAGT  | TTTACATTCA  |
| P.1        | GTTGGTGTTTA | TTACCCTGAC  | AAAGTTTTCA  | GATCCTCAGT  | TTTACATTCA  |
| B.1.617    | GTTGGTGTTTA | TTACCCTGAC  | AAAGTTTTCA  | GATCCTCAGT  | TTTACATTCA  |
| PRIMER 1F  | -----       | -----       | -----       | -----       | -----       |
| PRIMER 1R  | -----       | -----       | -----       | -----       | -----       |
| PRIMER 2F  | -----       | -----       | -----       | -----       | -----       |
| PRIMER 2R  | -----       | -----       | -----       | -----       | -----       |
| PRIMER 3F  | -----       | -----       | -----       | -----       | -----       |
| PRIMER 3R  | -----       | -----       | -----       | -----       | -----       |

PRIMER 4F -----  
PRIMER 4R -----  
PRIMER 5F -----  
PRIMER 5R -----  
PRIMER 6F -----  
PRIMER 6R -----  
PRIMER 7R -----  
PRIMER 8F -----

                  160                  170                  180                  190                  200  
      .....|.....|      .....|.....|      .....|.....|      .....|.....|      .....|.....|  
Wuhan-Hu-1 ACTCAGGACT TGTTCTTACC TTTCTTTTCC AATGTTACTT GGTTC CATGC  
B.1.1.7      ACTCAGGACT TGTTCTTACC TTTCTTTTCC AATGTTACTT GGTTC CATGC  
B.1.351      ACTCAGGACT TGTTCTTACC TTTCTTTTCC AATGTTACTT GGTTC CATGC  
P.1          ACTCAGGACT TGTTCTTACC TTTCTTTTCC AATGTTACTT GGTTC CATGC  
B.1.617      ACTCAGGACT TGTTCTTACC TTTCTTTTCC AATGTTACTT GGTTC CATGC  
PRIMER 1F -----  
PRIMER 1R -----  
PRIMER 2F -----  
PRIMER 2R -----  
PRIMER 3F -----  
PRIMER 3R -----  
PRIMER 4F -----  
PRIMER 4R -----  
PRIMER 5F -----  
PRIMER 5R -----  
PRIMER 6F -----  
PRIMER 6R -----  
PRIMER 7R -----  
PRIMER 8F -----

                  210                  220                  230                  240                  250  
      .....|.....|      .....|.....|      .....|.....|      .....|.....|      .....|.....|  
Wuhan-Hu-1 TATACATGTC TCTGGGACCA ATGGTACTAA GAGGTTTGAT AACCCGTGCC  
B.1.1.7      TA          TC TCTGGGACCA ATGGTACTAA GAGGTTTGAT AACCCGTGCC  
B.1.351      TATACATGTC TCTGGGACCA ATGGTACTAA GAGGTTTGCT AACCCGTGCC  
P.1          TATACATGTC TCTGGGACCA ATGGTACTAA GAGGTTTGAT AACCCGTGCC  
B.1.617      TATACATGTC TCTGGGACCA ATGGTACTAA GAGGTTTGAT AACCCGTGCC  
PRIMER 1F -----  
PRIMER 1R -----  
PRIMER 2F -----  
PRIMER 2R -----  
PRIMER 3F -----  
PRIMER 3R -----  
PRIMER 4F -----  
PRIMER 4R -----  
PRIMER 5F -----  
PRIMER 5R -----  
PRIMER 6F -----  
PRIMER 6R -----  
PRIMER 7R -----  
PRIMER 8F -----

                  260                  270                  280                  290                  300  
      .....|.....|      .....|.....|      .....|.....|      .....|.....|      .....|.....|  
Wuhan-Hu-1 TACCATTTAA TGATGGTGTT TATTTTGCTT CCACTGAGAA GTCTAACATA  
B.1.1.7      TACCATTTAA TGATGGTGTT TATTTTGCTT CCACTGAGAA GTCTAACATA  
B.1.351      TACCATTTAA TGATGGTGTT TATTTTGCTT CCACTGAGAA GTCTAACATA  
P.1          TACCATTTAA TGATGGTGTT TATTTTGCTT CCACTGAGAA GTCTAACATA  
B.1.617      TACCATTTAA TGATGGTGTT TATTTTGCTT CCACTGAGAA GTCTAACATA  
PRIMER 1F -----  
PRIMER 1R -----

PRIMER 2F -----  
 PRIMER 2R -----  
 PRIMER 3F -----  
 PRIMER 3R -----  
 PRIMER 4F -----  
 PRIMER 4R -----  
 PRIMER 5F -----  
 PRIMER 5R -----  
 PRIMER 6F -----  
 PRIMER 6R -----  
 PRIMER 7R -----  
 PRIMER 8F -----

310 320 330 340 350  
 .....|.....| .....|.....| .....|.....| .....|.....| .....|.....|  
 Wuhan-Hu-1 ATAAGAGGCT GGATTTTTGG TACTACTTTA GATTCGAAGA CCCAGTCCCT  
 B.1.1.7 ATAAGAGGCT GGATTTTTGG TACTACTTTA GATTCGAAGA CCCAGTCCCT  
 B.1.351 ATAAGAGGCT GGATTTTTGG TACTACTTTA GATTCGAAGA CCCAGTCCCT  
 P.1 ATAAGAGGCT GGATTTTTGG TACTACTTTA GATTCGAAGA CCCAGTCCCT  
 B.1.617 ATAAGAGGCT GGATTTTTGG TACTACTTTA GATTCGAAGA CCCAGTCCCT  
 PRIMER 1F -----  
 PRIMER 1R -----  
 PRIMER 2F -----  
 PRIMER 2R -----  
 PRIMER 3F -----  
 PRIMER 3R -----  
 PRIMER 4F -----  
 PRIMER 4R -----  
 PRIMER 5F -----  
 PRIMER 5R -----  
 PRIMER 6F -----  
 PRIMER 6R -----  
 PRIMER 7R -----  
 PRIMER 8F -----

360 370 380 390 400  
 .....|.....| .....|.....| .....|.....| .....|.....| .....|.....|  
 Wuhan-Hu-1 ACTTATTGTT AATAACGCTA CTAATGTTGT TATTAAAGTC TGTGAATTC  
 B.1.1.7 ACTTATTGTT AATAACGCTA CTAATGTTGT TATTAAAGTC TGTGAATTC  
 B.1.351 ACTTATTGTT AATAACGCTA CTAATGTTGT TATTAAAGTC TGTGAATTC  
 P.1 ACTTATTGTT AATAACGCTA CTAATGTTGT TATTAAAGTC TGTGAATTC  
 B.1.617 ACTTATTGTT AATAACGCTA CTAATGTTGT TATTAAAGTC TGTGAATTC  
 PRIMER 1F -----  
 PRIMER 1R -----  
 PRIMER 2F -----  
 PRIMER 2R -----  
 PRIMER 3F -----  
 PRIMER 3R -----  
 PRIMER 4F -----  
 PRIMER 4R -----  
 PRIMER 5F -----  
 PRIMER 5R -----  
 PRIMER 6F -----  
 PRIMER 6R -----  
 PRIMER 7R -----  
 PRIMER 8F -----

410 420 430 440 450  
 .....|.....| .....|.....| .....|.....| .....|.....| .....|.....|  
 Wuhan-Hu-1 AATTTTGTA TGAATCCATTT TTGGGTGTTT ATTACCACAA AAACAACAAA  
 B.1.1.7 AATTTTGTA TGAATCCATTT TTGGGTGTTT --TACCACAA AAACAACAAA  
 B.1.351 AATTTTGTA TGAATCCATTT TTGGGTGTTT ATTACCACAA AAACAACAAA

P.1 AATTTTGTA TATCCATTT TTGGGTGTTT ATTACCACAA AAACAACAAA  
 B.1.617 AATTTTGTA TGATCCATTT TTGGGTGTTT ATTACCACAA AAACAACAAA  
 PRIMER 1F -----  
 PRIMER 1R -----  
 PRIMER 2F -----  
 PRIMER 2R -----  
 PRIMER 3F -----  
 PRIMER 3R -----  
 PRIMER 4F -----  
 PRIMER 4R -----  
 PRIMER 5F -----  
 PRIMER 5R -----  
 PRIMER 6F -----  
 PRIMER 6R -----  
 PRIMER 7R -----  
 PRIMER 8F -----

460 470 480 490 500  
 .....|.....| .....|.....| .....|.....| .....|.....| .....|.....|  
 Wuhan-Hu-1 AGTTGGATGG AAAGTGAGTT CAGAGTTTAT TCTAGTGC GA ATAATTGCAC  
 B.1.1.7 AGTTGGATGG AAAGTGAGTT CAGAGTTTAT TCTAGTGC GA ATAATTGCAC  
 B.1.351 AGTTGGATGG AAAGTGAGTT CAGAGTTTAT TCTAGTGC GA ATAATTGCAC  
 P.1 AGTTGGATGG AAAGTGAGTT CAGAGTTTAT TCTAGTGC GA ATAATTGCAC  
 B.1.617 AGTTGGATGG AAAGTGAGTT CAGAGTTTAT TCTAGTGC GA ATAATTGCAC  
 PRIMER 1F -----  
 PRIMER 1R -----  
 PRIMER 2F -----  
 PRIMER 2R -----  
 PRIMER 3F -----  
 PRIMER 3R -----  
 PRIMER 4F -----  
 PRIMER 4R -----  
 PRIMER 5F -----  
 PRIMER 5R -----  
 PRIMER 6F -----  
 PRIMER 6R -----  
 PRIMER 7R -----  
 PRIMER 8F -----

510 520 530 540 550  
 .....|.....| .....|.....| .....|.....| .....|.....| .....|.....|  
 Wuhan-Hu-1 TTTTGAATAT GTCTCTCAGC CTTTTCTTAT GGACCTTGAA GGAAAAACAGG  
 B.1.1.7 TTTTGAATAT GTCTCTCAGC CTTTTCTTAT GGACCTTGAA GGAAAAACAGG  
 B.1.351 TTTTGAATAT GTCTCTCAGC CTTTTCTTAT GGACCTTGAA GGAAAAACAGG  
 P.1 TTTTGAATAT GTCTCTCAGC CTTTTCTTAT GGACCTTGAA GGAAAAACAGG  
 B.1.617 TTTTGAATAT GTCTCTCAGC CTTTTCTTAT GGACCTTGAA GGAAAAACAGG  
 PRIMER 1F -----  
 PRIMER 1R -----  
 PRIMER 2F -----  
 PRIMER 2R -----  
 PRIMER 3F -----  
 PRIMER 3R -----  
 PRIMER 4F -----  
 PRIMER 4R -----  
 PRIMER 5F -----  
 PRIMER 5R -----  
 PRIMER 6F -----  
 PRIMER 6R -----  
 PRIMER 7R -----  
 PRIMER 8F -----

560 570 580 590 600

|            |             |             |             |             |             |
|------------|-------------|-------------|-------------|-------------|-------------|
|            | ..... ..... | ..... ..... | ..... ..... | ..... ..... | ..... ..... |
| Wuhan-Hu-1 | GTAATTTCAA  | AAATCTTAGG  | GAATTTGTGT  | TTAAGAATAT  | TGATGGTTAT  |
| B.1.1.7    | GTAATTTCAA  | AAATCTTAGG  | GAATTTGTGT  | TTAAGAATAT  | TGATGGTTAT  |
| B.1.351    | GTAATTTCAA  | AAATCTTAGG  | GAATTTGTGT  | TTAAGAATAT  | TGATGGTTAT  |
| P.1        | GTAATTTCAA  | AAATCTTAGT  | GAATTTGTGT  | TTAAGAATAT  | TGATGGTTAT  |
| B.1.617    | GTAATTTCAA  | AAATCTTAGG  | GAATTTGTGT  | TTAAGAATAT  | TGATGGTTAT  |
| PRIMER 1F  | -----       | -----       | -----       | -----       | -----       |
| PRIMER 1R  | -----       | -----       | -----       | -----       | -----       |
| PRIMER 2F  | -----       | -----       | -----       | -----       | -----       |
| PRIMER 2R  | -----       | -----       | -----       | -----       | -----       |
| PRIMER 3F  | -----       | -----       | -----       | -----       | -----       |
| PRIMER 3R  | -----       | -----       | -----       | -----       | -----       |
| PRIMER 4F  | -----       | -----       | -----       | -----       | -----       |
| PRIMER 4R  | -----       | -----       | -----       | -----       | -----       |
| PRIMER 5F  | -----       | -----       | -----       | -----       | -----       |
| PRIMER 5R  | -----       | -----       | -----       | -----       | -----       |
| PRIMER 6F  | -----       | -----       | -----       | -----       | -----       |
| PRIMER 6R  | -----       | -----       | -----       | -----       | -----       |
| PRIMER 7R  | -----       | -----       | -----       | -----       | -----       |
| PRIMER 8F  | -----       | -----       | -----       | -----       | -----       |

|            |             |             |             |             |             |
|------------|-------------|-------------|-------------|-------------|-------------|
|            | 610         | 620         | 630         | 640         | 650         |
|            | ..... ..... | ..... ..... | ..... ..... | ..... ..... | ..... ..... |
| Wuhan-Hu-1 | TTTAAAAATAT | ATTCTAAGCA  | CACGCCTATT  | AATTTAGTGC  | GTGATCTCCC  |
| B.1.1.7    | TTTAAAAATAT | ATTCTAAGCA  | CACGCCTATT  | AATTTAGTGC  | GTGATCTCCC  |
| B.1.351    | TTTAAAAATAT | ATTCTAAGCA  | CACGCCTATT  | AATTTAGTGC  | GTGATCTCCC  |
| P.1        | TTTAAAAATAT | ATTCTAAGCA  | CACGCCTATT  | AATTTAGTGC  | GTGATCTCCC  |
| B.1.617    | TTTAAAAATAT | ATTCTAAGCA  | CACGCCTATT  | AATTTAGTGC  | GTGATCTCCC  |
| PRIMER 1F  | -----       | -----       | -----       | -----       | -----       |
| PRIMER 1R  | -----       | -----       | -----       | -----       | -----       |
| PRIMER 2F  | -----       | -----       | -----       | C           | GTGATCTCCC  |
| PRIMER 2R  | -----       | -----       | -----       | -----       | -----       |
| PRIMER 3F  | -----       | -----       | -----       | -----       | -----       |
| PRIMER 3R  | -----       | -----       | -----       | -----       | -----       |
| PRIMER 4F  | -----       | -----       | -----       | -----       | -----       |
| PRIMER 4R  | -----       | -----       | -----       | -----       | -----       |
| PRIMER 5F  | -----       | -----       | -----       | -----       | -----       |
| PRIMER 5R  | -----       | -----       | -----       | -----       | -----       |
| PRIMER 6F  | -----       | -----       | -----       | -----       | -----       |
| PRIMER 6R  | -----       | -----       | -----       | -----       | -----       |
| PRIMER 7R  | -----       | -----       | -----       | TTAGTGC     | GTGATCTCCC  |
| PRIMER 8F  | -----       | -----       | -----       | -----       | -----       |

|            |             |             |             |             |             |
|------------|-------------|-------------|-------------|-------------|-------------|
|            | 660         | 670         | 680         | 690         | 700         |
|            | ..... ..... | ..... ..... | ..... ..... | ..... ..... | ..... ..... |
| Wuhan-Hu-1 | TCAGGGTTTT  | TCGGCTTTAG  | AACCATTGGT  | AGATTTGCCA  | ATAGGTATTA  |
| B.1.1.7    | TCAGGGTTTT  | TCGGCTTTAG  | AACCATTGGT  | AGATTTGCCA  | ATAGGTATTA  |
| B.1.351    | TCAGGGTTTT  | TCGGCTTTAG  | AACCATTGGT  | AGATTTGCCA  | ATAGGTATTA  |
| P.1        | TCAGGGTTTT  | TCGGCTTTAG  | AACCATTGGT  | AGATTTGCCA  | ATAGGTATTA  |
| B.1.617    | TCAGGGTTTT  | TCGGTTTTAG  | AACCATTGGT  | AGATTTGCCA  | ATAGGTATTA  |
| PRIMER 1F  | -----       | -----       | -----       | -----       | -----       |
| PRIMER 1R  | -----       | -----       | -----       | -----       | -----       |
| PRIMER 2F  | TCAGGGTTTT  | -----       | -----       | -----       | -----       |
| PRIMER 2R  | -----       | -----       | -----       | -----       | -----       |
| PRIMER 3F  | -----       | -----       | -----       | -----       | -----       |
| PRIMER 3R  | -----       | -----       | -----       | -----       | -----       |
| PRIMER 4F  | -----       | -----       | -----       | -----       | -----       |
| PRIMER 4R  | -----       | -----       | -----       | -----       | -----       |
| PRIMER 5F  | -----       | -----       | -----       | -----       | -----       |
| PRIMER 5R  | -----       | -----       | -----       | -----       | -----       |
| PRIMER 6F  | -----       | -----       | -----       | -----       | -----       |
| PRIMER 6R  | -----       | -----       | -----       | -----       | -----       |

PRIMER 7R TCA-----  
PRIMER 8F -----

710 720 730 740 750

.....|.....| .....|.....| .....|.....| .....|.....| .....|.....|

Wuhan-Hu-1 ACATCACTAG GTTTCAAACT TTACTTGCTT TACATAGAAG TTATTTGACT  
B.1.1.7 ACATCACTAG GTTTCAAACT TTACTTGCTT TACATAGAAG TTATTTGACT  
B.1.351 ACATCACTAG GTTTCAAACT TTACTTGCTT TACATAGAAG TTATTTGACT  
P.1 ACATCACTAG GTTTCAAACT TTACTTGCTT TACATAGAAG TTATTTGACT  
B.1.617 ACATCACTAG GTTTCAAACT TTACTTGCTT TACATAGAAG TTATTTGACT  
PRIMER 1F -----  
PRIMER 1R -----  
PRIMER 2F -----  
PRIMER 2R -----  
PRIMER 3F -----  
PRIMER 3R -----  
PRIMER 4F -----  
PRIMER 4R -----  
PRIMER 5F -----  
PRIMER 5R -----  
PRIMER 6F -----  
PRIMER 6R -----  
PRIMER 7R -----  
PRIMER 8F -----

760 770 780 790 800

.....|.....| .....|.....| .....|.....| .....|.....| .....|.....|

Wuhan-Hu-1 CCTGGTGATT CTTCTTCAGG TTGGACAGCT GGTGCTGCAG CTTATTATGT  
B.1.1.7 CCTGGTGATT CTTCTTCAGG TTGGACAGCT GGTGCTGCAG CTTATTATGT  
B.1.351 CCTGGTGATT CTTCTTCAGG TTGGACAGCT GGTGCTGCAG CTTATTATGT  
P.1 CCTGGTGATT CTTCTTCAGG TTGGACAGCT GGTGCTGCAG CTTATTATGT  
B.1.617 CCTGGTGATT CTTCTTCAGG TTGGACAGCT GGTGCTGCAG CTTATTATGT  
PRIMER 1F -----  
PRIMER 1R -----  
PRIMER 2F -----  
PRIMER 2R -----  
PRIMER 3F -----  
PRIMER 3R -----  
PRIMER 4F -----  
PRIMER 4R -----  
PRIMER 5F -----  
PRIMER 5R -----  
PRIMER 6F -----  
PRIMER 6R -----  
PRIMER 7R -----  
PRIMER 8F -----

810 820 830 840 850

.....|.....| .....|.....| .....|.....| .....|.....| .....|.....|

Wuhan-Hu-1 GGGTTATCTT CAACCTAGGA CTTTTCTATT AAAATATAAT GAAAAATGGAA  
B.1.1.7 GGGTTATCTT CAACCTAGGA CTTTTCTATT AAAATATAAT GAAAAATGGAA  
B.1.351 GGGTTATCTT CAACCTAGGA CTTTTCTATT AAAATATAAT GAAAAATGGAA  
P.1 GGGTTATCTT CAACCTAGGA CTTTTCTATT AAAATATAAT GAAAAATGGAA  
B.1.617 GGGTTATCTT CAACCTAGGA CTTTTCTATT AAAATATAAT GAAAAATGGAA  
PRIMER 1F -----  
PRIMER 1R -----  
PRIMER 2F -----  
PRIMER 2R -----  
PRIMER 3F -----  
PRIMER 3R -----  
PRIMER 4F -----  
PRIMER 4R -----

PRIMER 5F -----  
PRIMER 5R -----  
PRIMER 6F -----  
PRIMER 6R -----  
PRIMER 7R -----  
PRIMER 8F -----

860 870 880 890 900  
.....|.....| .....|.....| .....|.....| .....|.....| .....|.....|  
Wuhan-Hu-1 CCATTACAGA TGCTGTAGAC TGTGCACTTG ACCCTCTCTC AGAAACAAAG  
B.1.1.7 CCATTACAGA TGCTGTAGAC TGTGCACTTG ACCCTCTCTC AGAAACAAAG  
B.1.351 CCATTACAGA TGCTGTAGAC TGTGCACTTG ACCCTCTCTC AGAAACAAAG  
P.1 CCATTACAGA TGCTGTAGAC TGTGCACTTG ACCCTCTCTC AGAAACAAAG  
B.1.617 CCATTACAGA TGCTGTAGAC TGTGCACTTG ACCCTCTCTC AGAAACAAAG  
PRIMER 1F -----  
PRIMER 1R ----- G  
PRIMER 2F -----  
PRIMER 2R -----  
PRIMER 3F -----  
PRIMER 3R -----  
PRIMER 4F -----  
PRIMER 4R -----  
PRIMER 5F -----  
PRIMER 5R -----  
PRIMER 6F -----  
PRIMER 6R -----  
PRIMER 7R -----  
PRIMER 8F -----

910 920 930 940 950  
.....|.....| .....|.....| .....|.....| .....|.....| .....|.....|  
Wuhan-Hu-1 TGTACGTTGA AATCCTTCAC TGTAGAAAAA GGAATCTATC AAACCTTCTAA  
B.1.1.7 TGTACGTTGA AATCCTTCAC TGTAGAAAAA GGAATCTATC AAACCTTCTAA  
B.1.351 TGTACGTTGA AATCCTTCAC TGTAGAAAAA GGAATCTATC AAACCTTCTAA  
P.1 TGTACGTTGA AATCCTTCAC TGTAGAAAAA GGAATCTATC AAACCTTCTAA  
B.1.617 TGTACGTTGA AATCCTTCAC TGTAGAAAAA GGAATCTATC AAACCTTCTAA  
PRIMER 1F -----  
PRIMER 1R TGTACGTTGA AATCCTTCAC TGT -----  
PRIMER 2F -----  
PRIMER 2R -----  
PRIMER 3F -----  
PRIMER 3R -----  
PRIMER 4F -----  
PRIMER 4R -----  
PRIMER 5F -----  
PRIMER 5R -----  
PRIMER 6F -----  
PRIMER 6R -----  
PRIMER 7R -----  
PRIMER 8F -----

960 970 980 990 1000  
.....|.....| .....|.....| .....|.....| .....|.....| .....|.....|  
Wuhan-Hu-1 CTTTAGAGTC CAACCAACAG AATCTATTGT TAGATTTCCCT AATATTACAA  
B.1.1.7 CTTTAGAGTC CAACCAACAG AATCTATTGT TAGATTTCCCT AATATTACAA  
B.1.351 CTTTAGAGTC CAACCAACAG AATCTATTGT TAGATTTCCCT AATATTACAA  
P.1 CTTTAGAGTC CAACCAACAG AATCTATTGT TAGATTTCCCT AATATTACAA  
B.1.617 CTTTAGAGTC CAACCAACAG AATCTATTGT TAGATTTCCCT AATATTACAA  
PRIMER 1F -----  
PRIMER 1R -----  
PRIMER 2F -----  
PRIMER 2R -----

PRIMER 3F -----  
PRIMER 3R -----  
PRIMER 4F -----  
PRIMER 4R -----  
PRIMER 5F -----  
PRIMER 5R -----  
PRIMER 6F -----  
PRIMER 6R -----  
PRIMER 7R -----  
PRIMER 8F -----

                  1010                  1020                  1030                  1040                  1050  
    .....|.....|  .....|.....|  .....|.....|  .....|.....|  .....|.....|  
Wuhan-Hu-1  ACTTGTGCCC  TTTTGGTGAA  GTTTTTAACG  CCACCAGATT  TGCATCTGTT  
B.1.1.7      ACTTGTGCCC  TTTTGGTGAA  GTTTTTAACG  CCACCAGATT  TGCATCTGTT  
B.1.351      ACTTGTGCCC  TTTTGGTGAA  GTTTTTAACG  CCACCAGATT  TGCATCTGTT  
P.1          ACTTGTGCCC  TTTTGGTGAA  GTTTTTAACG  CCACCAGATT  TGCATCTGTT  
B.1.617      ACTTGTGCCC  TTTTGGTGAA  GTTTTTAACG  CCACCAGATT  TGCATCTGTT  
PRIMER 1F  -----  
PRIMER 1R  -----  
PRIMER 2F  -----  
PRIMER 2R  -----  
PRIMER 3F  -----  
PRIMER 3R  -----  
PRIMER 4F  -----  
PRIMER 4R  -----  
PRIMER 5F  -----  
PRIMER 5R  -----  
PRIMER 6F  -----  
PRIMER 6R  -----  
PRIMER 7R  -----  
PRIMER 8F  -----

                  1060                  1070                  1080                  1090                  1100  
    .....|.....|  .....|.....|  .....|.....|  .....|.....|  .....|.....|  
Wuhan-Hu-1  TATGCTTGGA  ACAGGAAGAG  AATCAGCAAC  TGTGTTGCTG  ATTATTCTGT  
B.1.1.7      TATGCTTGGA  ACAGGAAGAG  AATCAGCAAC  TGTGTTGCTG  ATTATTCTGT  
B.1.351      TATGCTTGGA  ACAGGAAGAG  AATCAGCAAC  TGTGTTGCTG  ATTATTCTGT  
P.1          TATGCTTGGA  ACAGGAAGAG  AATCAGCAAC  TGTGTTGCTG  ATTATTCTGT  
B.1.617      TATGCTTGGA  ACAGGAAGAG  AATCAGCAAC  TGTGTTGCTG  ATTATTCTGT  
PRIMER 1F  -----  
PRIMER 1R  -----  
PRIMER 2F  -----  
PRIMER 2R  -----  
PRIMER 3F  -----  
PRIMER 3R  -----  
PRIMER 4F  -----  
PRIMER 4R  -----  
PRIMER 5F  -----  
PRIMER 5R  -----  
PRIMER 6F  -----  
PRIMER 6R  -----  
PRIMER 7R  -----  
PRIMER 8F  -----

                  1110                  1120                  1130                  1140                  1150  
    .....|.....|  .....|.....|  .....|.....|  .....|.....|  .....|.....|  
Wuhan-Hu-1  CCTATATAAT  TCCGCATCAT  TTTCCACTTT  TAAGTGTAT  GGAGTGTCTC  
B.1.1.7      CCTATATAAT  TCCGCATCAT  TTTCCACTTT  TAAGTGTAT  GGAGTGTCTC  
B.1.351      CCTATATAAT  TCTGCATCAT  TTTCCACTTT  TAAGTGTAT  GGAGTGTCTC  
P.1          CCTATATAAT  TCCGCATCAT  TTTCCACTTT  TAAGTGTAT  GGAGTGTCTC  
B.1.617      CCTATATAAT  TCCGCATCAT  TTTCCACTTT  TAAGTGTAT  GGAGTGTCTC



PRIMER 1F -----  
 PRIMER 1R -----  
 PRIMER 2F -----  
 PRIMER 2R -----  
 PRIMER 3F -----  
 PRIMER 3R -----  
 PRIMER 4F -----  
 PRIMER 4R -----  
 PRIMER 5F -----  
 PRIMER 5R -----  
 PRIMER 6F -----  
 PRIMER 6R -----  
 PRIMER 7R -----  
 PRIMER 8F -----

1160 1170 1180 1190 1200  
 .....|.....| .....|.....| .....|.....| .....|.....| .....|.....|  
 Wuhan-Hu-1 CTACTAAATT AAATGATCTC TGCTTTACTA ATGTCTATGC AGATTCATTT  
 B.1.1.7 CTACTAAATT AAATGATCTC TGCTTTACTA ATGTCTATGC AGATTCATTT  
 B.1.351 CTACTAAATT AAATGATCTC TGCTTTACTA ATGTCTATGC AGATTCATTT  
 P.1 CTACTAAATT AAATGATCTC TGCTTTACTA ATGTCTATGC AGATTCATTT  
 B.1.617 CTACTAAATT AAATGATCTC TGCTTTACTA ATGTCTATGC AGATTCATTT  
 PRIMER 1F -----  
 PRIMER 1R -----  
 PRIMER 2F -----  
 PRIMER 2R -----  
 PRIMER 3F -----  
 PRIMER 3R -----  
 PRIMER 4F -----  
 PRIMER 4R -----  
 PRIMER 5F -----  
 PRIMER 5R -----  
 PRIMER 6F -----  
 PRIMER 6R -----  
 PRIMER 7R -----  
 PRIMER 8F -----

1210 1220 1230 1240 1250  
 .....|.....| .....|.....| .....|.....| .....|.....| .....|.....|  
 Wuhan-Hu-1 GTAATTAGAG GTGATGAAGT CAGACAAATC GCTCCAGGGC AAAC TGGAAA  
 B.1.1.7 GTAATTAGAG GTGATGAAGT CAGACAAATC GCTCCAGGGC AAAC TGGAAA  
 B.1.351 GTAATTAGAG GTGATGAAGT CAGACAAATC GCTCCAGGGC AAAC TGGAAA  
 P.1 GTAATTAGAG GTGATGAAGT CAGACAAATC GCTCCAGGGC AAAC TGGAAC  
 B.1.617 GTAATTAGAG GTGATGAAGT CAGACAAATC GCTCCAGGGC AAAC TGGAAA  
 PRIMER 1F -----  
 PRIMER 1R -----  
 PRIMER 2F -----  
 PRIMER 2R ----- GGC AAAC TGGAAA  
 PRIMER 3F GTAATTAGAG GTGATGAAGT CAGA -----  
 PRIMER 3R -----  
 PRIMER 4F -----  
 PRIMER 4R -----  
 PRIMER 5F -----  
 PRIMER 5R -----  
 PRIMER 6F -----  
 PRIMER 6R -----  
 PRIMER 7R -----  
 PRIMER 8F -----

1260 1270 1280 1290 1300  
 .....|.....| .....|.....| .....|.....| .....|.....| .....|.....|  
 Wuhan-Hu-1 GATTGCTGAT TATAATTATA AATTACCAGA TGATTTTACA GGCTGCGTTA

|           |            |            |            |            |            |
|-----------|------------|------------|------------|------------|------------|
| B.1.1.7   | GATTGCTGAT | TATAATTATA | AATTACCAGA | TGATTTTACA | GGCTGCGTTA |
| B.1.351   | GATTGCTGAT | TATAATTATA | AATTACCAGA | TGATTTTACA | GGCTGCGTTA |
| P.1       | GATTGCTGAT | TATAATTATA | AATTACCAGA | TGATTTTACA | GGCTGCGTTA |
| B.1.617   | GATTGCTGAT | TATAATTATA | AATTACCAGA | TGATTTTACA | GGCTGCGTTA |
| PRIMER 1F | -----      | -----      | -----      | -----      | -----      |
| PRIMER 1R | -----      | -----      | -----      | -----      | -----      |
| PRIMER 2F | -----      | -----      | -----      | -----      | -----      |
| PRIMER 2R | GATTGCTGA  | -----      | -----      | -----      | -----      |
| PRIMER 3F | -----      | -----      | -----      | -----      | -----      |
| PRIMER 3R | -----      | -----      | -----      | -----      | -----      |
| PRIMER 4F | -----      | -----      | -----      | -----      | -----      |
| PRIMER 4R | -----      | -----      | -----      | -----      | -----      |
| PRIMER 5F | -----      | -----      | -----      | -----      | -----      |
| PRIMER 5R | -----      | -----      | -----      | -----      | -----      |
| PRIMER 6F | -----      | -----      | -----      | -----      | -----      |
| PRIMER 6R | -----      | -----      | -----      | -----      | -----      |
| PRIMER 7R | -----      | -----      | -----      | -----      | -----      |
| PRIMER 8F | -----      | -----      | -----      | -----      | -----      |

|            |             |             |             |             |             |
|------------|-------------|-------------|-------------|-------------|-------------|
|            | 1310        | 1320        | 1330        | 1340        | 1350        |
|            | ..... ..... | ..... ..... | ..... ..... | ..... ..... | ..... ..... |
| Wuhan-Hu-1 | TAGCTTGGAA  | TTCTAACAAAT | CTTGATTCTA  | AGGTTGGTGG  | TAATTATAAT  |
| B.1.1.7    | TAGCTTGGAA  | TTCTAACAAAT | CTTGATTCTA  | AGGTTGGTGG  | TAATTATAAT  |
| B.1.351    | TAGCTTGGAA  | TTCTAACAAAT | CTTGATTCTA  | AGGTTGGTGG  | TAATTATAAT  |
| P.1        | TAGCTTGGAA  | TTCTAACAAAT | CTTGATTCTA  | AGGTTGGTGG  | TAATTATAAT  |
| B.1.617    | TAGCTTGGAA  | TTCTAACAAAT | CTTGATTCTA  | AGGTTGGTGG  | TAATTATAAT  |
| PRIMER 1F  | -----       | -----       | -----       | -----       | -----       |
| PRIMER 1R  | -----       | -----       | -----       | -----       | -----       |
| PRIMER 2F  | -----       | -----       | -----       | -----       | -----       |
| PRIMER 2R  | -----       | -----       | -----       | -----       | -----       |
| PRIMER 3F  | -----       | -----       | -----       | -----       | -----       |
| PRIMER 3R  | -----       | -----       | -----       | -----       | -----       |
| PRIMER 4F  | -----       | -----       | -----       | -----       | -----       |
| PRIMER 4R  | -----       | -----       | -----       | -----       | -----       |
| PRIMER 5F  | -----       | -----       | -----       | -----       | -----       |
| PRIMER 5R  | -----       | -----       | -----       | -----       | -----       |
| PRIMER 6F  | -----       | -----       | -----       | -----       | -----       |
| PRIMER 6R  | -----       | -----       | -----       | -----       | -----       |
| PRIMER 7R  | -----       | -----       | -----       | -----       | -----       |
| PRIMER 8F  | -----       | -----       | -----       | -----       | -----       |

|            |             |             |             |             |             |
|------------|-------------|-------------|-------------|-------------|-------------|
|            | 1360        | 1370        | 1380        | 1390        | 1400        |
|            | ..... ..... | ..... ..... | ..... ..... | ..... ..... | ..... ..... |
| Wuhan-Hu-1 | TACCTGTATA  | GATTGTTTAG  | GAAGTCTAAT  | CTCAAACCTT  | TTGAGAGAGA  |
| B.1.1.7    | TACCTGTATA  | GATTGTTTAG  | GAAGTCTAAT  | CTCAAACCTT  | TTGAGAGAGA  |
| B.1.351    | TACCTGTATA  | GATTGTTTAG  | GAAGTCTAAT  | CTCAAACCTT  | TTGAGAGAGA  |
| P.1        | TACCTGTATA  | GATTGTTTAG  | GAAGTCTAAT  | CTCAAACCTT  | TTGAGAGAGA  |
| B.1.617    | TACCGGTATA  | GATTGTTTAG  | GAAGTCTAAT  | CTCAAACCTT  | TTGAGAGAGA  |
| PRIMER 1F  | -----       | -----       | -----       | -----       | -----       |
| PRIMER 1R  | -----       | -----       | -----       | -----       | -----       |
| PRIMER 2F  | -----       | -----       | -----       | -----       | -----       |
| PRIMER 2R  | -----       | -----       | -----       | -----       | -----       |
| PRIMER 3F  | -----       | -----       | -----       | -----       | -----       |
| PRIMER 3R  | -----       | -----       | -----       | -----       | -----       |
| PRIMER 4F  | -----       | -----       | -----       | -----       | -----       |
| PRIMER 4R  | -----       | -----       | -----       | -----       | -----       |
| PRIMER 5F  | -----       | -----       | -----       | -----       | -----       |
| PRIMER 5R  | -----       | -----       | -----       | -----       | -----       |
| PRIMER 6F  | -----       | -----       | -----       | -----       | -----       |
| PRIMER 6R  | -----       | -----       | -----       | -----       | -----       |
| PRIMER 7R  | -----       | -----       | -----       | -----       | -----       |
| PRIMER 8F  | -----       | -----       | -----       | -----       | -----       |

|            | 1410        | 1420        | 1430        | 1440        | 1450        |
|------------|-------------|-------------|-------------|-------------|-------------|
| Wuhan-Hu-1 | ..... ..... | ..... ..... | ..... ..... | ..... ..... | ..... ..... |
|            | TATTTCAACT  | GAAATCTATC  | AGGCCGGTAG  | CACACCTTGT  | AATGGTGTG   |
| B.1.1.7    | TATTTCAACT  | GAAATCTATC  | AGGCCGGTAG  | CACACCTTGT  | AATGGTGTG   |
| B.1.351    | TATTTCAACT  | GAAATCTATC  | AGGCCGGTAG  | CACACCTTGT  | AATGGTGTG   |
| P.1        | TATTTCAACT  | GAAATCTATC  | AGGCCGGTAG  | CACACCTTGT  | AATGGTGTG   |
| B.1.617    | TATTTCAACT  | GAAATCTATC  | AGGCCGGTAG  | CAAACCTTGT  | AATGGTGTG   |
| PRIMER 1F  | -----       | -----       | -----       | -----       | -----       |
| PRIMER 1R  | -----       | -----       | -----       | -----       | -----       |
| PRIMER 2F  | -----       | -----       | -----       | -----       | -----       |
| PRIMER 2R  | -----       | -----       | -----       | -----       | -----       |
| PRIMER 3F  | -----       | -----       | -----       | -----       | -----       |
| PRIMER 3R  | -----       | -----       | -----       | -----       | -----       |
| PRIMER 4F  | -----       | -----       | -----       | -----       | -----       |
| PRIMER 4R  | -----       | -----       | -----       | -----       | -----       |
| PRIMER 5F  | -----       | -----       | -----       | -----       | -----       |
| PRIMER 5R  | -----       | -----       | -----       | -----       | -----       |
| PRIMER 6F  | -----       | -----       | -----       | -----       | -----       |
| PRIMER 6R  | -----       | -----       | -----       | -----       | -----       |
| PRIMER 7R  | -----       | -----       | -----       | -----       | -----       |
| PRIMER 8F  | -----       | -----       | -----       | -----       | -----       |

|            | 1460        | 1470        | 1480        | 1490        | 1500        |
|------------|-------------|-------------|-------------|-------------|-------------|
| Wuhan-Hu-1 | ..... ..... | ..... ..... | ..... ..... | ..... ..... | ..... ..... |
|            | AAGGTTTTAA  | TTGTTACTTT  | CCTTTACAAT  | CATATGGTTT  | CCAACCCACT  |
| B.1.1.7    | AAGGTTTTAA  | TTGTTACTTT  | CCTTTACAAT  | CATATGGTTT  | CCAACCCACT  |
| B.1.351    | AAGGTTTTAA  | TTGTTACTTT  | CCTTTACAAT  | CATATGGTTT  | CCAACCCACT  |
| P.1        | AAGGTTTTAA  | TTGTTACTTT  | CCTTTACAAT  | CATATGGTTT  | CCAACCCACT  |
| B.1.617    | AAGGTTTTAA  | TTGTTACTTT  | CCTTTACAAT  | CATATGGTTT  | CCAACCCACT  |
| PRIMER 1F  | -----       | -----       | -----       | -----       | -----       |
| PRIMER 1R  | -----       | -----       | -----       | -----       | -----       |
| PRIMER 2F  | -----       | -----       | -----       | -----       | -----       |
| PRIMER 2R  | -----       | -----       | -----       | -----       | -----       |
| PRIMER 3F  | -----       | -----       | -----       | -----       | -----       |
| PRIMER 3R  | -----       | -----       | -----       | -----       | -----       |
| PRIMER 4F  | -----       | -----       | -----       | -----       | -----       |
| PRIMER 4R  | -----       | -----       | -----       | -----       | -----       |
| PRIMER 5F  | -----       | -----       | -----       | -----       | -----       |
| PRIMER 5R  | -----       | -----       | -----       | -----       | -----       |
| PRIMER 6F  | -----       | -----       | -----       | -----       | -----       |
| PRIMER 6R  | -----       | -----       | -----       | -----       | -----       |
| PRIMER 7R  | -----       | -----       | -----       | -----       | -----       |
| PRIMER 8F  | -----       | -----       | -----       | -----       | -----       |

|            | 1510        | 1520        | 1530        | 1540        | 1550        |
|------------|-------------|-------------|-------------|-------------|-------------|
| Wuhan-Hu-1 | ..... ..... | ..... ..... | ..... ..... | ..... ..... | ..... ..... |
|            | AATGGTGTG   | GTTACCAACC  | ATACAGAGTA  | GTAGTACTTT  | CTTTTGAACT  |
| B.1.1.7    | TATGGTGTG   | GTTACCAACC  | ATACAGAGTA  | GTAGTACTTT  | CTTTTGAACT  |
| B.1.351    | TATGGTGTG   | GTTACCAACC  | ATACAGAGTA  | GTAGTACTTT  | CTTTTGAACT  |
| P.1        | TATGGTGTG   | GTTACCAACC  | ATACAGAGTA  | GTAGTACTTT  | CTTTTGAACT  |
| B.1.617    | AATGGTGTG   | GTTACCAACC  | ATACAGAGTA  | GTAGTACTTT  | CTTTTGAACT  |
| PRIMER 1F  | -----       | -----       | -----       | -----       | -----       |
| PRIMER 1R  | -----       | -----       | -----       | -----       | -----       |
| PRIMER 2F  | -----       | -----       | -----       | -----       | -----       |
| PRIMER 2R  | -----       | -----       | -----       | -----       | -----       |
| PRIMER 3F  | -----       | -----       | -----       | -----       | -----       |
| PRIMER 3R  | -----       | -----       | -----       | -----       | -----       |
| PRIMER 4F  | -----       | -----       | -----       | -----       | -----       |
| PRIMER 4R  | -----       | -----       | -----       | -----       | -----       |
| PRIMER 5F  | -----       | -----       | -----       | -----       | -----       |
| PRIMER 5R  | -----       | -----       | -----       | -----       | -----       |

```

PRIMER 6F -----
PRIMER 6R -----
PRIMER 7R -----
PRIMER 8F -----

                1560      1570      1580      1590      1600
                .....|.....| .....|.....| .....|.....| .....|.....|
Wuhan-Hu-1    TCTACATGCA CCAGCAACTG TTTGTGGACC TAAAAAGTCT ACTAATTTGG
B.1.1.7      TCTACATGCA CCAGCAACTG TTTGTGGACC TAAAAAGTCT ACTAATTTGG
B.1.351      TCTACATGCA CCAGCAACTG TTTGTGGACC TAAAAAGTCT ACTAATTTGG
P.1          TCTACATGCA CCAGCAACTG TTTGTGGACC TAAAAAGTCT ACTAATTTGG
B.1.617      TCTACATGCA CCAGCAACTG TTTGTGGACC TAAAAAGTCT ACTAATTTGG
PRIMER 1F -----
PRIMER 1R -----
PRIMER 2F -----
PRIMER 2R -----
PRIMER 3F -----
PRIMER 3R -----
PRIMER 4F -----
PRIMER 4R -----
PRIMER 5F -----
PRIMER 5R -----
PRIMER 6F -----
PRIMER 6R -----
PRIMER 7R -----
PRIMER 8F -----

```

```

                1610      1620      1630      1640      1650
                .....|.....| .....|.....| .....|.....| .....|.....|
Wuhan-Hu-1    TAAAAAACAA ATGTGTCAAT TTCAACTTCA ATGGTTTAAC AGGCACAGGT
B.1.1.7      TAAAAAACAA ATGTGTCAAT TTCAACTTCA ATGGTTTAAC AGGCACAGGT
B.1.351      TAAAAAACAA ATGTGTCAAT TTCAACTTCA ATGGTTTAAC AGGCACAGGT
P.1          TAAAAAACAA ATGTGTCAAT TTCAACTTCA ATGGTTTAAC AGGCACAGGT
B.1.617      TAAAAAACAA ATGTGTCAAT TTCAACTTCA ATGGTTTAAC AGGCACAGGT
PRIMER 1F -----
PRIMER 1R -----
PRIMER 2F -----
PRIMER 2R -----
PRIMER 3F -----
PRIMER 3R -----
PRIMER 4F -----
PRIMER 4R -----
PRIMER 5F -----
PRIMER 5R -----
PRIMER 6F -----
PRIMER 6R -----
PRIMER 7R -----
PRIMER 8F -----

```

```

                1660      1670      1680      1690      1700
                .....|.....| .....|.....| .....|.....| .....|.....|
Wuhan-Hu-1    GTTCTTACTG AGTCTAACAA AAAGTTTCTG CCTTTCCAAC AATTTGGCAG
B.1.1.7      GTTCTTACTG AGTCTAACAA AAAGTTTCTG CCTTTCCAAC AATTTGGCAG
B.1.351      GTTCTTACTG AGTCTAACAA AAAGTTTCTG CCTTTCCAAC AATTTGGCAG
P.1          GTTCTTACTG AGTCTAACAA AAAGTTTCTG CCTTTCCAAC AATTTGGCAG
B.1.617      GTTCTTACTG AGTCTAACAA AAAGTTTCTG CCTTTCCAAC AATTTGGCAG
PRIMER 1F -----
PRIMER 1R -----
PRIMER 2F -----
PRIMER 2R -----
PRIMER 3F -----
PRIMER 3R -----

```

PRIMER 4F -----  
PRIMER 4R -----  
PRIMER 5F -----  
PRIMER 5R -----  
PRIMER 6F -----  
PRIMER 6R -----  
PRIMER 7R -----  
PRIMER 8F -----

1710 1720 1730 1740 1750  
.....|.....| .....|.....| .....|.....| .....|.....| .....|.....|  
Wuhan-Hu-1 AGACATTGCT GACACTACTG ATGCTGTCCG TGATCCACAG ACACCTTGAGA  
B.1.1.7 AGACATTGAT GACACTACTG ATGCTGTCCG TGATCCACAG ACACCTTGAGA  
B.1.351 AGACATTGCT GACACTACTG ATGCTGTCCG TGATCCACAG ACACCTTGAGA  
P.1 AGACATTGCT GACACTACTG ATGCTGTCCG TGATCCACAG ACACCTTGAGA  
B.1.617 AGACATTGCT GACACTACTG ATGCTGTCCG TGATCCACAG ACACCTTGAGA  
PRIMER 1F -----  
PRIMER 1R -----  
PRIMER 2F -----  
PRIMER 2R -----  
PRIMER 3F -----  
PRIMER 3R -----  
PRIMER 4F -----  
PRIMER 4R -----  
PRIMER 5F -----  
PRIMER 5R -----  
PRIMER 6F -----  
PRIMER 6R -----  
PRIMER 7R -----  
PRIMER 8F -----

1760 1770 1780 1790 1800  
.....|.....| .....|.....| .....|.....| .....|.....| .....|.....|  
Wuhan-Hu-1 TTCTTGACAT TACACCATGT TCTTTTGGTG GTGTCAGTGT TATAACACCA  
B.1.1.7 TTCTTGACAT TACACCATGT TCTTTTGGTG GTGTCAGTGT TATAACACCA  
B.1.351 TTCTTGACAT TACACCATGT TCTTTTGGTG GTGTCAGTGT TATAACACCA  
P.1 TTCTTGACAT TACACCATGT TCTTTTGGTG GTGTCAGTGT TATAACACCA  
B.1.617 TTCTTGACAT TACACCATGT TCTTTTGGTG GTGTCAGTGT TATAACACCA  
PRIMER 1F -----  
PRIMER 1R -----  
PRIMER 2F -----  
PRIMER 2R -----  
PRIMER 3F -----  
PRIMER 3R -----  
PRIMER 4F -----  
PRIMER 4R -----  
PRIMER 5F -----  
PRIMER 5R -----  
PRIMER 6F -----  
PRIMER 6R -----  
PRIMER 7R -----  
PRIMER 8F -----

1810 1820 1830 1840 1850  
.....|.....| .....|.....| .....|.....| .....|.....| .....|.....|  
Wuhan-Hu-1 GGAACAAATA CTTCTAACCA GGTGCTGTT CTTTATCAGG ATGTTAACTG  
B.1.1.7 GGAACAAATA CTTCTAACCA GGTGCTGTT CTTTATCAGG ATGTTAACTG  
B.1.351 GGAACAAATA CTTCTAACCA GGTGCTGTT CTTTATCAGG ATGTTAACTG  
P.1 GGAACAAATA CTTCTAACCA GGTGCTGTT CTTTATCAGG ATGTTAACTG  
B.1.617 GGAACAAATA CTTCTAACCA GGTGCTGTT CTTTATCAGG ATGTTAACTG  
PRIMER 1F -----  
PRIMER 1R -----

PRIMER 2F -----  
 PRIMER 2R -----  
 PRIMER 3F -----  
 PRIMER 3R -----  
 PRIMER 4F -----  
 PRIMER 4R -----  
 PRIMER 5F -----  
 PRIMER 5R -----  
 PRIMER 6F -----  
 PRIMER 6R -----  
 PRIMER 7R -----  
 PRIMER 8F -----

1860 1870 1880 1890 1900  
 .....|.....| .....|.....| .....|.....| .....|.....| .....|.....|  
 Wuhan-Hu-1 CACAGAAGTC CCTGTTGCTA TTCATGCAGA TCAACTTACT CCTACTTGGC  
 B.1.1.7 CACAGAAGTC CCTGTTGCTA TTCATGCAGA TCAACTTACT CCTACTTGGC  
 B.1.351 CACAGAAGTC CCTGTTGCTA TTCATGCAGA TCAACTTACT CCTACTTGGC  
 P.1 CACAGAAGTC CCTGTTGCTA TTCATGCAGA TCAACTTACT CCTACTTGGC  
 B.1.617 CACAGAAGTC CCTGTTGCTA TTCATGCAGA TCAACTTACT CCTACTTGGC  
 PRIMER 1F -----  
 PRIMER 1R -----  
 PRIMER 2F -----  
 PRIMER 2R -----  
 PRIMER 3F -----  
 PRIMER 3R -----  
 PRIMER 4F ----- CTTGGC  
 PRIMER 4R -----  
 PRIMER 5F -----  
 PRIMER 5R -----  
 PRIMER 6F -----  
 PRIMER 6R -----  
 PRIMER 7R -----  
 PRIMER 8F -----

1910 1920 1930 1940 1950  
 .....|.....| .....|.....| .....|.....| .....|.....| .....|.....|  
 Wuhan-Hu-1 GTGTTTATTC TACAGGTTCT AATGTTTTTC AAACACGTGC AGGCTGTTTA  
 B.1.1.7 GTGTTTATTC TACAGGTTCT AATGTTTTTC AAACACGTGC AGGCTGTTTA  
 B.1.351 GTGTTTATTC TACAGGTTCT AATGTTTTTC AAACACGTGC AGGCTGTTTA  
 P.1 GTGTTTATTC TACAGGTTCT AATGTTTTTC AAACACGTGC AGGCTGTTTA  
 B.1.617 GTGTTTATTC TACAGGTTCT AATGTTTTTC AAACACGTGC AGGCTGTTTA  
 PRIMER 1F -----  
 PRIMER 1R -----  
 PRIMER 2F -----  
 PRIMER 2R -----  
 PRIMER 3F -----  
 PRIMER 3R -----  
 PRIMER 4F GTGTTTATTC TACAG -----  
 PRIMER 4R -----  
 PRIMER 5F -----  
 PRIMER 5R -----  
 PRIMER 6F -----  
 PRIMER 6R -----  
 PRIMER 7R -----  
 PRIMER 8F -----

1960 1970 1980 1990 2000  
 .....|.....| .....|.....| .....|.....| .....|.....| .....|.....|  
 Wuhan-Hu-1 ATAGGGGCTG AACATGTCAA CAACTCATAT GAGTGTGACA TACCCATTGG  
 B.1.1.7 ATAGGGGCTG AACATGTCAA CAACTCATAT GAGTGTGACA TACCCATTGG  
 B.1.351 ATAGGGGCTG AACATGTCAA CAACTCATAT GAGTGTGACA TACCCATTGG

P.1 ATAGGGGCTG AATATGTCAA CAACTCATAT GAGTGTGACA TACCCATTGG  
 B.1.617 ATAGGGGCTG AACATGTCAA CAACTCATAT GAGTGTGACA TACCCATTGG  
 PRIMER 1F -----  
 PRIMER 1R -----  
 PRIMER 2F -----  
 PRIMER 2R -----  
 PRIMER 3F -----  
 PRIMER 3R -----  
 PRIMER 4F -----  
 PRIMER 4R -----  
 PRIMER 5F -----  
 PRIMER 5R -----  
 PRIMER 6F -----  
 PRIMER 6R -----  
 PRIMER 7R -----  
 PRIMER 8F -----

2010 2020 2030 2040 2050  
 .....|.....| .....|.....| .....|.....| .....|.....| .....|.....|  
 Wuhan-Hu-1 TGCAGGTATA TGCGCTAGTT ATCAGACTCA GACTAATTCT CCTCGGC GGG  
 B.1.1.7 TGCAGGTATA TGCGCTAGTT ATCAGACTCA GACTAATTCT CATCGGC GGG  
 B.1.351 TGCAGGTATA TGCGCTAGTT ATCAGACTCA GACTAATTCT CCTCGGC GGG  
 P.1 TGCAGGTATA TGCGCTAGTT ATCAGACTCA GACTAATTCT CCTCGGC GGG  
 B.1.617 TGCAGGTATA TGCGCTAGTT ATCAGACTCA GACTAATTCT CGTCGGC GGG  
 PRIMER 1F -----  
 PRIMER 1R -----  
 PRIMER 2F -----  
 PRIMER 2R -----  
 PRIMER 3F -----  
 PRIMER 3R -----  
 PRIMER 4F -----  
 PRIMER 4R -----  
 PRIMER 5F -----  
 PRIMER 5R -----  
 PRIMER 6F -----  
 PRIMER 6R -----  
 PRIMER 7R -----  
 PRIMER 8F -----

2060 2070 2080 2090 2100  
 .....|.....| .....|.....| .....|.....| .....|.....| .....|.....|  
 Wuhan-Hu-1 CACGTAGTGT AGCTAGTCAA TCCATCATTG CCTACACTAT GTCAC TTGGT  
 B.1.1.7 CACGTAGTGT AGCTAGTCAA TCCATCATTG CCTACACTAT GTCAC TTGGT  
 B.1.351 CACGTAGTGT AGCTAGTCAA TCCATCATTG CCTACACTAT GTCAC TTGGT  
 P.1 CACGTAGTGT AGCTAGTCAA TCCATCATTG CCTACACTAT GTCAC TTGGT  
 B.1.617 CACGTAGTGT AGCTAGTCAA TCCATCATTG CCTACACTAT GTCAC TTGGT  
 PRIMER 1F -----  
 PRIMER 1R -----  
 PRIMER 2F -----  
 PRIMER 2R -----  
 PRIMER 3F -----  
 PRIMER 3R ----- TCCATCATTG CCTACACTAT GT -----  
 PRIMER 4F -----  
 PRIMER 4R -----  
 PRIMER 5F -----  
 PRIMER 5R -----  
 PRIMER 6F -----  
 PRIMER 6R -----  
 PRIMER 7R -----  
 PRIMER 8F -----

2110 2120 2130 2140 2150

```

.....|.....| .....|.....| .....|.....| .....|.....| .....|.....|
Wuhan-Hu-1 GCAGAAAATT CAGTTGCTTA CTCTAATAAC TCTATTGCCA TACCCACAAA
B.1.1.7 GCAGAAAATT CAGTTGCTTA CTCTAATAAC TCTATTGCCA TACCCATAAA
B.1.351 GTAGAAAATT CAGTTGCTTA CTCTAATAAC TCTATTGCCA TACCCACAAA
P.1 GCAGAAAATT CAGTTGCTTA CTCTAATAAC TCTATTGCCA TACCCACAAA
B.1.617 GCAGAAAATT CAGTTGCTTA CTCTAATAAC TCTATTGCCA TACCCACAAA
PRIMER 1F -----
PRIMER 1R -----
PRIMER 2F -----
PRIMER 2R -----
PRIMER 3F -----
PRIMER 3R -----
PRIMER 4F -----
PRIMER 4R -----
PRIMER 5F -----
PRIMER 5R -----
PRIMER 6F -----
PRIMER 6R -----
PRIMER 7R -----
PRIMER 8F -----

```

```

                2160          2170          2180          2190          2200
.....|.....| .....|.....| .....|.....| .....|.....| .....|.....|
Wuhan-Hu-1 TTTTACTATT AGTGTTACCA CAGAAAATTC ACCAGTGTCT ATGACCAAGA
B.1.1.7 TTTTACTATT AGTGTTACCA CAGAAAATTC ACCAGTGTCT ATGACCAAGA
B.1.351 TTTTACTATT AGTGTTACCA CAGAAAATTC ACCAGTGTCT ATGACCAAGA
P.1 TTTTACTATT AGTGTTACCA CAGAAAATTC ACCAGTGTCT ATGACCAAGA
B.1.617 TTTTACTATT AGTGTTACCA CAGAAAATTC ACCAGTGTCT ATGACCAAGA
PRIMER 1F -----
PRIMER 1R -----
PRIMER 2F -----
PRIMER 2R -----
PRIMER 3F -----
PRIMER 3R -----
PRIMER 4F -----
PRIMER 4R -----
PRIMER 5F -----
PRIMER 5R -----
PRIMER 6F -----
PRIMER 6R -----
PRIMER 7R -----
PRIMER 8F -----

```

```

                2210          2220          2230          2240          2250
.....|.....| .....|.....| .....|.....| .....|.....| .....|.....|
Wuhan-Hu-1 CATCAGTAGA TTGTACAATG TACATTTGTG GTGATTCAAC TGAATGCAGC
B.1.1.7 CATCAGTAGA TTGTACAATG TACATTTGTG GTGATTCAAC TGAATGCAGC
B.1.351 CATCAGTAGA TTGTACAATG TACATTTGTG GTGATTCAAC TGAATGCAGC
P.1 CATCAGTAGA TTGTACAATG TACATTTGTG GTGATTCAAC TGAATGCAGC
B.1.617 CATCAGTAGA TTGTACAATG TACATTTGTG GTGATTCAAC TGAATGCAGC
PRIMER 1F -----
PRIMER 1R -----
PRIMER 2F -----
PRIMER 2R -----
PRIMER 3F -----
PRIMER 3R -----
PRIMER 4F -----
PRIMER 4R -----
PRIMER 5F -----
PRIMER 5R -----
PRIMER 6F -----
PRIMER 6R -----

```



```

PRIMER 7R -----
PRIMER 8F -----

                2260      2270      2280      2290      2300
      . . . . | . . . . | . . . . | . . . . | . . . . |
Wuhan-Hu-1  AATCTTTTGT TGCAATATGG CAGTTTTTGT ACACAATTAA ACCGTGCTTT
B.1.1.7    AATCTTTTGT TGCAATATGG CAGTTTTTGT ACACAATTAA ACCGTGCTTT
B.1.351    AATCTTTTGT TGCAATATGG CAGTTTTTGT ACACAATTAA ACCGTGCTTT
P.1        AATCTTTTGT TGCAATATGG CAGTTTTTGT ACACAATTAA ACCGTGCTTT
B.1.617    AATCTTTTGT TGCAATATGG CAGTTTTTGT ACACAATTAA ACCGTGCTTT
PRIMER 1F  -----
PRIMER 1R  -----
PRIMER 2F  -----
PRIMER 2R  -----
PRIMER 3F  -----
PRIMER 3R  -----
PRIMER 4F  -----
PRIMER 4R  -----
PRIMER 5F  -----
PRIMER 5R  -----
PRIMER 6F  -----
PRIMER 6R  -----
PRIMER 7R  -----
PRIMER 8F  -----

```

```

                2310      2320      2330      2340      2350
      . . . . | . . . . | . . . . | . . . . | . . . . |
Wuhan-Hu-1  AACTGGAATA GCTGTTGAAC AAGACAAAAA CACCCAAGAA GTTTTTGCAC
B.1.1.7    AACTGGAATA GCTGTTGAAC AAGACAAAAA CACCCAAGAA GTTTTTGCAC
B.1.351    AACTGGAATA GCTGTTGAAC AAGACAAAAA CACCCAAGAA GTTTTTGCAC
P.1        AACTGGAATA GCTGTTGAAC AAGACAAAAA CACCCAAGAA GTTTTTGCAC
B.1.617    AACTGGAATA GCTGTTGAAC AAGACAAAAA CACCCAAGAA GTTTTTGCAC
PRIMER 1F  -----
PRIMER 1R  -----
PRIMER 2F  -----
PRIMER 2R  -----
PRIMER 3F  -----
PRIMER 3R  -----
PRIMER 4F  -----
PRIMER 4R  -----
PRIMER 5F  -----
PRIMER 5R  -----
PRIMER 6F  -----
PRIMER 6R  -----
PRIMER 7R  -----
PRIMER 8F  -----

```

```

                2360      2370      2380      2390      2400
      . . . . | . . . . | . . . . | . . . . | . . . . |
Wuhan-Hu-1  AAGTCAAACA AATTTACAAA ACACCACCAA TTAAAGATTT TGGTGGTTTT
B.1.1.7    AAGTCAAACA AATTTACAAA ACACCACCAA TTAAAGATTT TGGTGGTTTT
B.1.351    AAGTCAAACA AATTTACAAA ACACCACCAA TTAAAGATTT TGGTGGTTTT
P.1        AAGTCAAACA AATTTACAAA ACACCACCAA TTAAAGATTT TGGTGGTTTT
B.1.617    AAGTCAAACA AATTTACAAA ACACCACCAA TTAAAGATTT TGGTGGTTTT
PRIMER 1F  -----
PRIMER 1R  -----
PRIMER 2F  -----
PRIMER 2R  -----
PRIMER 3F  -----
PRIMER 3R  -----
PRIMER 4F  -----
PRIMER 4R  -----

```

PRIMER 5F -----  
PRIMER 5R -----  
PRIMER 6F -----  
PRIMER 6R -----  
PRIMER 7R -----  
PRIMER 8F -----

                  2410          2420          2430          2440          2450  
    .....|.....|  .....|.....|  .....|.....|  .....|.....|  .....|.....|  
Wuhan-Hu-1  AATTTTTTCAC  AAATATTACC  AGATCCATCA  AAACCAAGCA  AGAGGTCATT  
B.1.1.7      AATTTTTTCAC  AAATATTACC  AGATCCATCA  AAACCAAGCA  AGAGGTCATT  
B.1.351      AATTTTTTCAC  AAATATTACC  AGATCCATCA  AAACCAAGCA  AGAGGTCATT  
P.1          AATTTTTTCAC  AAATATTACC  AGATCCATCA  AAACCAAGCA  AGAGGTCATT  
B.1.617      AATTTTTTCAC  AAATATTACC  AGATCCATCA  AAACCAAGCA  AGAGGTCATT  
PRIMER 1F    -----  
PRIMER 1R    -----  
PRIMER 2F    -----  
PRIMER 2R    -----  
PRIMER 3F    -----  
PRIMER 3R    -----  
PRIMER 4F    -----  
PRIMER 4R    -----  
PRIMER 5F    -----  
PRIMER 5R    -----  
PRIMER 6F    -----  
PRIMER 6R    -----  
PRIMER 7R    -----  
PRIMER 8F    -----

                  2460          2470          2480          2490          2500  
    .....|.....|  .....|.....|  .....|.....|  .....|.....|  .....|.....|  
Wuhan-Hu-1  TATTGAAGAT  CTACTTTTCA  ACAAAGTGAC  ACTTGCAGAT  GCTGGCTTCA  
B.1.1.7      TATTGAAGAT  CTACTTTTCA  ACAAAGTGAC  ACTTGCAGAT  GCTGGCTTCA  
B.1.351      TATTGAAGAT  CTACTTTTCA  ACAAAGTGAC  ACTTGCAGAT  GCTGGCTTCA  
P.1          TATTGAAGAT  CTACTTTTCA  ACAAAGTGAC  ACTTGCAGAT  GCTGGCTTCA  
B.1.617      TATTGAAGAT  CTACTTTTCA  ACAAAGTGAC  ACTTGCAGAT  GCTGGCTTCA  
PRIMER 1F    -----  
PRIMER 1R    -----  
PRIMER 2F    -----  
PRIMER 2R    -----  
PRIMER 3F    -----  
PRIMER 3R    -----  
PRIMER 4F    -----  
PRIMER 4R    -----  
PRIMER 5F    -----  
PRIMER 5R    -----  
PRIMER 6F    -----  
PRIMER 6R    -----  
PRIMER 7R    -----  
PRIMER 8F    -----

                  2510          2520          2530          2540          2550  
    .....|.....|  .....|.....|  .....|.....|  .....|.....|  .....|.....|  
Wuhan-Hu-1  TCAAACAATA  TGGTGATTGC  CTTGGTGATA  TTGCTGCTAG  AGACCTCATT  
B.1.1.7      TCAAACAATA  TGGTGATTGC  CTTGGTGATA  TTGCTGCTAG  AGACCTCATT  
B.1.351      TCAAACAATA  TGGTGATTGC  CTTGGTGATA  TTGCTGCTAG  AGACCTCATT  
P.1          TCAAACAATA  TGGTGATTGC  CTTGGTGATA  TTGCTGCTAG  AGACCTCATT  
B.1.617      TCAAACAATA  TGGTGATTGC  CTTGGTGATA  TTGCTGCTAG  AGACCTCATT  
PRIMER 1F    -----  
PRIMER 1R    -----  
PRIMER 2F    -----  
PRIMER 2R    -----

PRIMER 3F -----  
PRIMER 3R -----  
PRIMER 4F -----  
PRIMER 4R -----  
PRIMER 5F -----  
PRIMER 5R -----  
PRIMER 6F -----  
PRIMER 6R -----  
PRIMER 7R -----  
PRIMER 8F -----

                  2560          2570          2580          2590          2600  
    .....|.....|  .....|.....|  .....|.....|  .....|.....|  .....|.....|  
Wuhan-Hu-1  **TGTGCACAAA  AGTTTAACGG  CCTTACTGTT  TTGCCACCTT  TGCTCACAGA**  
B.1.1.7      **TGTGCACAAA  AGTTTAACGG  CCTTACTGTT  TTGCCACCTT  TGCTCACAGA**  
B.1.351      **TGTGCACAAA  AGTTTAACGG  CCTTACTGTT  TTGCCACCTT  TGCTCACAGA**  
P.1          **TGTGCACAAA  AGTTTAACGG  CCTTACTGTT  TTGCCACCTT  TGCTCACAGA**  
B.1.617      **TGTGCACAAA  AGTTTAACGG  CCTTACTGTT  TTGCCACCTT  TGCTCACAGA**  
PRIMER 1F  -----  
PRIMER 1R  -----  
PRIMER 2F  -----  
PRIMER 2R  -----  
PRIMER 3F  -----  
PRIMER 3R  -----  
PRIMER 4F  -----  
PRIMER 4R  -----  
PRIMER 5F  -----  
PRIMER 5R  -----  
PRIMER 6F  -----  
PRIMER 6R  -----  
PRIMER 7R  -----  
PRIMER 8F  -----

                  2610          2620          2630          2640          2650  
    .....|.....|  .....|.....|  .....|.....|  .....|.....|  .....|.....|  
Wuhan-Hu-1  **TGAAATGATT  GCTCAATACA  CTTCTGCACT  GTTAGCGGGT  ACAATCACTT**  
B.1.1.7      **TGAAATGATT  GCTCAATACA  CTTCTGCACT  GTTAGCGGGT  ACAATCACTT**  
B.1.351      **TGAAATGATT  GCTCAATACA  CTTCTGCACT  GTTAGCGGGT  ACAATCACTT**  
P.1          **TGAAATGATT  GCTCAATACA  CTTCTGCACT  GTTAGCGGGT  ACAATCACTT**  
B.1.617      **TGAAATGATT  GCTCAATACA  CTTCTGCACT  GTTAGCGGGT  ACAATCACTT**  
PRIMER 1F  -----  
PRIMER 1R  -----  
PRIMER 2F  -----  
PRIMER 2R  -----  
PRIMER 3F  -----  
PRIMER 3R  -----  
PRIMER 4F  -----  
PRIMER 4R  -----  
PRIMER 5F  -----  
PRIMER 5R  -----  
PRIMER 6F  -----  
PRIMER 6R  -----  
PRIMER 7R  -----  
PRIMER 8F  -----

                  2660          2670          2680          2690          2700  
    .....|.....|  .....|.....|  .....|.....|  .....|.....|  .....|.....|  
Wuhan-Hu-1  **CTGGTTGGAC  CTTTGGTGCA  GGTGCTGCAT  TACAAATACC  ATTTGCTATG**  
B.1.1.7      **CTGGTTGGAC  CTTTGGTGCA  GGTGCTGCAT  TACAAATACC  ATTTGCTATG**  
B.1.351      **CTGGTTGGAC  CTTTGGTGCA  GGTGCTGCAT  TACAAATACC  ATTTGCTATG**  
P.1          **CTGGTTGGAC  CTTTGGTGCA  GGTGCTGCAT  TACAAATACC  ATTTGCTATG**  
B.1.617      **CTGGTTGGAC  CTTTGGTGCA  GGTGCTGCAT  TACAAATACC  ATTTGCTATG**

PRIMER 1F -----  
PRIMER 1R -----  
PRIMER 2F -----  
PRIMER 2R -----  
PRIMER 3F -----  
PRIMER 3R -----  
PRIMER 4F -----  
PRIMER 4R -----  
PRIMER 5F -----  
PRIMER 5R -----  
PRIMER 6F -----  
PRIMER 6R -----  
PRIMER 7R -----  
PRIMER 8F -----

2710 2720 2730 2740 2750  
.....|.....| .....|.....| .....|.....| .....|.....| .....|.....|  
Wuhan-Hu-1 CAAATGGCTT ATAGGTTTAA TGGTATTGGA GTTACACAGA ATGTTCTCTA  
B.1.1.7 CAAATGGCTT ATAGGTTTAA TGGTATTGGA GTTACACAGA ATGTTCTCTA  
B.1.351 CAAATGGCTT ATAGGTTTAA TGGTATTGGA GTTACACAGA ATGTTCTCTA  
P.1 CAAATGGCTT ATAGGTTTAA TGGTATTGGA GTTACACAGA ATGTTCTCTA  
B.1.617 CAAATGGCTT ATAGGTTTAA TGGTATTGGA GTTACACAGA ATGTTCTCTA  
PRIMER 1F -----  
PRIMER 1R -----  
PRIMER 2F -----  
PRIMER 2R -----  
PRIMER 3F -----  
PRIMER 3R -----  
PRIMER 4F -----  
PRIMER 4R -----  
PRIMER 5F -----  
PRIMER 5R -----  
PRIMER 6F -----  
PRIMER 6R -----  
PRIMER 7R -----  
PRIMER 8F -----

2760 2770 2780 2790 2800  
.....|.....| .....|.....| .....|.....| .....|.....| .....|.....|  
Wuhan-Hu-1 TGAGAACCAA AAATTGATTG CCAACCAATT TAATAGTGCT ATTGGCAAAA  
B.1.1.7 TGAGAACCAA AAATTGATTG CCAACCAATT TAATAGTGCT ATTGGCAAAA  
B.1.351 TGAGAACCAA AAATTGATTG CCAACCAATT TAATAGTGCT ATTGGCAAAA  
P.1 TGAGAACCAA AAATTGATTG CCAACCAATT TAATAGTGCT ATTGGCAAAA  
B.1.617 TGAGAACCAA AAATTGATTG CCAACCAATT TAATAGTGCT ATTGGCAAAA  
PRIMER 1F -----  
PRIMER 1R -----  
PRIMER 2F -----  
PRIMER 2R -----  
PRIMER 3F -----  
PRIMER 3R -----  
PRIMER 4F -----  
PRIMER 4R -----  
PRIMER 5F -----  
PRIMER 5R -----  
PRIMER 6F -----  
PRIMER 6R -----  
PRIMER 7R -----  
PRIMER 8F -----

2810 2820 2830 2840 2850  
.....|.....| .....|.....| .....|.....| .....|.....| .....|.....|  
Wuhan-Hu-1 TTCAAGACTC ACTTTCCTCC ACAGCAAGTG CACTTGGAAA ACTTCAAGAT

B.1.1.7 **TTCAAGACTC** **ACTTTCCTTCC** **ACAGCAAGTG** **CACTTGGAAA** **ACTTCAAGAT**  
 B.1.351 **TTCAAGACTC** **ACTTTCCTTCC** **ACAGCAAGTG** **CACTTGGAAA** **ACTTCAAGAT**  
 P.1 **TTCAAGACTC** **ACTTTCCTTCC** **ACAGCAAGTG** **CACTTGGAAA** **ACTTCAAGAT**  
 B.1.617 **TTCAAGACTC** **ACTTTCCTTCC** **ACAGCAAGTG** **CACTTGGAAA** **ACTTCAAAAT**  
 PRIMER 1F -----  
 PRIMER 1R -----  
 PRIMER 2F -----  
 PRIMER 2R -----  
 PRIMER 3F -----  
 PRIMER 3R -----  
 PRIMER 4F -----  
 PRIMER 4R -----  
 PRIMER 5F **AGACTC** **ACTTTCCTTCC** **ACAGCA** -----  
 PRIMER 5R -----  
 PRIMER 6F -----  
 PRIMER 6R -----  
 PRIMER 7R -----  
 PRIMER 8F -----

2860 2870 2880 2890 2900  
 .....|.....| .....|.....| .....|.....| .....|.....| .....|.....|  
 Wuhan-Hu-1 **G****TGGTCAACC** **A****AAATGCACA** **A****GC****TTTAAAC** **A****CG****TTGTTA** **A****ACA****ACTTAG**  
 B.1.1.7 **G****TGGTCAACC** **A****AAATGCACA** **A****GC****TTTAAAC** **A****CG****TTGTTA** **A****ACA****ACTTAG**  
 B.1.351 **G****TGGTCAACC** **A****AAATGCACA** **A****GC****TTTAAAC** **A****CG****TTGTTA** **A****ACA****ACTTAG**  
 P.1 **G****TGGTCAACC** **A****AAATGCACA** **A****GC****TTTAAAC** **A****CG****TTGTTA** **A****ACA****ACTTAG**  
 B.1.617 **G****TGGTCAACC** **A****AAATGCACA** **A****GC****TTTAAAC** **A****CG****TTGTTA** **A****ACA****ACTTAG**  
 PRIMER 1F -----  
 PRIMER 1R -----  
 PRIMER 2F -----  
 PRIMER 2R -----  
 PRIMER 3F -----  
 PRIMER 3R -----  
 PRIMER 4F -----  
 PRIMER 4R **G****T****CAACC** **A****AAATGCACA** **A****GC** -----  
 PRIMER 5F -----  
 PRIMER 5R -----  
 PRIMER 6F -----  
 PRIMER 6R -----  
 PRIMER 7R -----  
 PRIMER 8F -----

2910 2920 2930 2940 2950  
 .....|.....| .....|.....| .....|.....| .....|.....| .....|.....|  
 Wuhan-Hu-1 **C****TCCAATTTT** **G****TGCAATTT** **C****AAGTGTTTT** **A****AA****TGATATC** **C****TTT****CACGTC**  
 B.1.1.7 **C****TCCAATTTT** **G****TGCAATTT** **C****AAGTGTTTT** **A****AA****TGATATC** **C****TTT****CACGTC**  
 B.1.351 **C****TCCAATTTT** **G****TGCAATTT** **C****AAGTGTTTT** **A****AA****TGATATC** **C****TTT****CACGTC**  
 P.1 **C****TCCAATTTT** **G****TGCAATTT** **C****AAGTGTTTT** **A****AA****TGATATC** **C****TTT****CACGTC**  
 B.1.617 **C****TCCAATTTT** **G****TGCAATTT** **C****AAGTGTTTT** **A****AA****TGATATC** **C****TTT****CACGTC**  
 PRIMER 1F -----  
 PRIMER 1R -----  
 PRIMER 2F -----  
 PRIMER 2R -----  
 PRIMER 3F -----  
 PRIMER 3R -----  
 PRIMER 4F -----  
 PRIMER 4R -----  
 PRIMER 5F -----  
 PRIMER 5R -----  
 PRIMER 6F -----  
 PRIMER 6R -----  
 PRIMER 7R -----  
 PRIMER 8F -----

|            | 2960        | 2970        | 2980        | 2990        | 3000        |
|------------|-------------|-------------|-------------|-------------|-------------|
| Wuhan-Hu-1 | ..... ..... | ..... ..... | ..... ..... | ..... ..... | ..... ..... |
|            | TTGACAAAGT  | TGAGGCTGAA  | GTGCAAATTG  | ATAGGTTGAT  | CACAGGCAGA  |
| B.1.1.7    | TTGACAAAGT  | TGAGGCTGAA  | GTGCAAATTG  | ATAGGTTGAT  | CACAGGCAGA  |
| B.1.351    | TTGACAAAGT  | TGAGGCTGAA  | GTGCAAATTG  | ATAGGTTGAT  | CACAGGCAGA  |
| P.1        | TTGACAAAGT  | TGAGGCTGAA  | GTGCAAATTG  | ATAGGTTGAT  | CACAGGCAGA  |
| B.1.617    | TTGACAAAGT  | TGAGGCTGAA  | GTGCAAATTG  | ATAGGTTGAT  | CACAGGCAGA  |
| PRIMER 1F  | -----       | -----       | -----       | -----       | -----       |
| PRIMER 1R  | -----       | -----       | -----       | -----       | -----       |
| PRIMER 2F  | -----       | -----       | -----       | -----       | -----       |
| PRIMER 2R  | -----       | -----       | -----       | -----       | -----       |
| PRIMER 3F  | -----       | -----       | -----       | -----       | -----       |
| PRIMER 3R  | -----       | -----       | -----       | -----       | -----       |
| PRIMER 4F  | -----       | -----       | -----       | -----       | -----       |
| PRIMER 4R  | -----       | -----       | -----       | -----       | -----       |
| PRIMER 5F  | -----       | -----       | -----       | -----       | -----       |
| PRIMER 5R  | -----       | -----       | -----       | -----       | -----       |
| PRIMER 6F  | -----       | -----       | -----       | -----       | -----       |
| PRIMER 6R  | -----       | -----       | -----       | -----       | -----       |
| PRIMER 7R  | -----       | -----       | -----       | -----       | -----       |
| PRIMER 8F  | -----       | -----       | -----       | -----       | -----       |

|            | 3010        | 3020        | 3030        | 3040        | 3050        |
|------------|-------------|-------------|-------------|-------------|-------------|
| Wuhan-Hu-1 | ..... ..... | ..... ..... | ..... ..... | ..... ..... | ..... ..... |
|            | CTTCAAAGTT  | TGCAGACATA  | TGTGACTCAA  | CAATTAATTA  | GAGCTGCAGA  |
| B.1.1.7    | CTTCAAAGTT  | TGCAGACATA  | TGTGACTCAA  | CAATTAATTA  | GAGCTGCAGA  |
| B.1.351    | CTTCAAAGTT  | TGCAGACATA  | TGTGACTCAA  | CAATTAATTA  | GAGCTGCAGA  |
| P.1        | CTTCAAAGTT  | TGCAGACATA  | TGTGACTCAA  | CAATTAATTA  | GAGCTGCAGA  |
| B.1.617    | CTTCAAAGTT  | TGCAGACATA  | TGTGACTCAA  | CAATTAATTA  | GAGCTGCAGA  |
| PRIMER 1F  | -----       | -----       | -----       | -----       | -----       |
| PRIMER 1R  | -----       | -----       | -----       | -----       | -----       |
| PRIMER 2F  | -----       | -----       | -----       | -----       | -----       |
| PRIMER 2R  | -----       | -----       | -----       | -----       | -----       |
| PRIMER 3F  | -----       | -----       | -----       | -----       | -----       |
| PRIMER 3R  | -----       | -----       | -----       | -----       | -----       |
| PRIMER 4F  | -----       | -----       | -----       | -----       | -----       |
| PRIMER 4R  | -----       | -----       | -----       | -----       | -----       |
| PRIMER 5F  | -----       | -----       | -----       | -----       | -----       |
| PRIMER 5R  | -----       | -----       | -----       | -----       | -----       |
| PRIMER 6F  | -----       | -----       | -----       | -----       | -----       |
| PRIMER 6R  | -----       | -----       | -----       | -----       | -----       |
| PRIMER 7R  | -----       | -----       | -----       | -----       | -----       |
| PRIMER 8F  | -----       | -----       | -----       | -----       | -----       |

|            | 3060        | 3070        | 3080        | 3090        | 3100        |
|------------|-------------|-------------|-------------|-------------|-------------|
| Wuhan-Hu-1 | ..... ..... | ..... ..... | ..... ..... | ..... ..... | ..... ..... |
|            | AATCAGAGCT  | TCTGCTAATC  | TTGCTGCTAC  | TAAAATGTCA  | GAGTGTGTAC  |
| B.1.1.7    | AATCAGAGCT  | TCTGCTAATC  | TTGCTGCTAC  | TAAAATGTCA  | GAGTGTGTAC  |
| B.1.351    | AATCAGAGCT  | TCTGCTAATC  | TTGCTGCTAC  | TAAAATGTCA  | GAGTGTGTAC  |
| P.1        | AATCAGAGCT  | TCTGCTAATC  | TTGCTGCTAT  | TAAAATGTCA  | GAGTGTGTAC  |
| B.1.617    | AATCAGAGCT  | TCTGCTAATC  | TTGCTGCTAC  | TAAAATGTCA  | GAGTGTGTAC  |
| PRIMER 1F  | -----       | -----       | -----       | -----       | -----       |
| PRIMER 1R  | -----       | -----       | -----       | -----       | -----       |
| PRIMER 2F  | -----       | -----       | -----       | -----       | -----       |
| PRIMER 2R  | -----       | -----       | -----       | -----       | -----       |
| PRIMER 3F  | -----       | -----       | -----       | -----       | -----       |
| PRIMER 3R  | -----       | -----       | -----       | -----       | -----       |
| PRIMER 4F  | -----       | -----       | -----       | -----       | -----       |
| PRIMER 4R  | -----       | -----       | -----       | -----       | -----       |
| PRIMER 5F  | -----       | -----       | -----       | -----       | -----       |
| PRIMER 5R  | -----       | -----       | -----       | -----       | -----       |

PRIMER 6F ----- T TCTGCTAATC TTGCTGCTAC T -----  
PRIMER 6R -----  
PRIMER 7R -----  
PRIMER 8F ----- T TCTGCTAATC TTGCTGCTAC T -----

3110 3120 3130 3140 3150  
.....|.....| .....|.....| .....|.....| .....|.....| .....|.....|  
Wuhan-Hu-1 TTGGACAATC AAAAAAGAGTT GATTTTTTGTG GAAAGGGCTA TCATCTTATG  
B.1.1.7 TTGGACAATC AAAAAAGAGTT GATTTTTTGTG GAAAGGGCTA TCATCTTATG  
B.1.351 TTGGACAATC AAAAAAGAGTT GATTTTTTGTG GAAAGGGCTA TCATCTTATG  
P.1 TTGGACAATC AAAAAAGAGTT GATTTTTTGTG GAAAGGGCTA TCATCTTATG  
B.1.617 TTGGACAATC AAAAAAGAGTT GATTTTTTGTG GAAAGGGCTA TCATCTTATG  
PRIMER 1F -----  
PRIMER 1R -----  
PRIMER 2F -----  
PRIMER 2R -----  
PRIMER 3F -----  
PRIMER 3R -----  
PRIMER 4F -----  
PRIMER 4R -----  
PRIMER 5F -----  
PRIMER 5R ----- TGTG GAAAGGGCTA TCATCT -----  
PRIMER 6F -----  
PRIMER 6R -----  
PRIMER 7R -----  
PRIMER 8F -----

3160 3170 3180 3190 3200  
.....|.....| .....|.....| .....|.....| .....|.....| .....|.....|  
Wuhan-Hu-1 TCCTTCCCTC AGTCAGCACC TCATGGTGTA GTCTTCTTGC ATGTGACTTA  
B.1.1.7 TCCTTCCCTC AGTCAGCACC TCATGGTGTA GTCTTCTTGC ATGTGACTTA  
B.1.351 TCCTTCCCTC AGTCAGCACC TCATGGTGTA GTCTTCTTGC ATGTGACTTA  
P.1 TCCTTCCCTC AGTCAGCACC TCATGGTGTA GTCTTCTTGC ATGTGACTTA  
B.1.617 TCCTTCCCTC AGTCAGCACC TCATGGTGTA GTCTTCTTGC ATGTGACTTA  
PRIMER 1F -----  
PRIMER 1R -----  
PRIMER 2F -----  
PRIMER 2R -----  
PRIMER 3F -----  
PRIMER 3R -----  
PRIMER 4F -----  
PRIMER 4R -----  
PRIMER 5F -----  
PRIMER 5R -----  
PRIMER 6F -----  
PRIMER 6R -----  
PRIMER 7R -----  
PRIMER 8F -----

3210 3220 3230 3240 3250  
.....|.....| .....|.....| .....|.....| .....|.....| .....|.....|  
Wuhan-Hu-1 TGTCCCTGCA CAAGAAAAGA ACTTCACAAC TGCTCCTGCC ATTTGTCATG  
B.1.1.7 TGTCCCTGCA CAAGAAAAGA ACTTCACAAC TGCTCCTGCC ATTTGTCATG  
B.1.351 TGTCCCTGCA CAAGAAAAGA ACTTCACAAC TGCTCCTGCC ATTTGTCATG  
P.1 TGTCCCTGCA CAAGAAAAGA ACTTCACAAC TGCTCCTGCC ATTTGTCATG  
B.1.617 TGTCCCTGCA CAAGAAAAGA ACTTCACAAC TGCTCCTGCC ATTTGTCATG  
PRIMER 1F -----  
PRIMER 1R -----  
PRIMER 2F -----  
PRIMER 2R -----  
PRIMER 3F -----  
PRIMER 3R -----

PRIMER 4F -----  
PRIMER 4R -----  
PRIMER 5F -----  
PRIMER 5R -----  
PRIMER 6F -----  
PRIMER 6R -----  
PRIMER 7R -----  
PRIMER 8F -----

3260 3270 3280 3290 3300  
.....|.....| .....|.....| .....|.....| .....|.....| .....|.....|  
Wuhan-Hu-1 ATGGAAAAGC ACAC TTCCT CGTGAAGGTG TCTTTGTTTC AAATGGCACA  
B.1.1.7 ATGGAAAAGC ACAC TTCCT CGTGAAGGTG TCTTTGTTTC AAATGGCACA  
B.1.351 ATGGAAAAGC ACAC TTCCT CGTGAAGGTG TCTTTGTTTC AAATGGCACA  
P.1 ATGGAAAAGC ACAC TTCCT CGTGAAGGTG TCTTTGTTTC AAATGGCACA  
B.1.617 ATGGAAAAGC ACAC TTCCT CGTGAAGGTG TCTTTGTTTC AAATGGCACA  
PRIMER 1F -----  
PRIMER 1R -----  
PRIMER 2F -----  
PRIMER 2R -----  
PRIMER 3F -----  
PRIMER 3R -----  
PRIMER 4F -----  
PRIMER 4R -----  
PRIMER 5F -----  
PRIMER 5R -----  
PRIMER 6F -----  
PRIMER 6R -----  
PRIMER 7R -----  
PRIMER 8F -----

3310 3320 3330 3340 3350  
.....|.....| .....|.....| .....|.....| .....|.....| .....|.....|  
Wuhan-Hu-1 CACTGGTTTG TAACACAAAG GAA TTTTAT GAACCACAAA TCATTACTAC  
B.1.1.7 CACTGGTTTG TAACACAAAG GAA TTTTAT GAACCACAAA TCATTACTAC  
B.1.351 CACTGGTTTG TAACACAAAG GAA TTTTAT GAACCACAAA TCATTACTAC  
P.1 CACTGGTTTG TAACACAAAG GAA TTTTAT GAACCACAAA TCATTACTAC  
B.1.617 CACTGGTTTG TAACACAAAG GAA TTTTAT GAACCACAAA TCATTACTAC  
PRIMER 1F -----  
PRIMER 1R -----  
PRIMER 2F -----  
PRIMER 2R -----  
PRIMER 3F -----  
PRIMER 3R -----  
PRIMER 4F -----  
PRIMER 4R -----  
PRIMER 5F -----  
PRIMER 5R -----  
PRIMER 6F -----  
PRIMER 6R -----  
PRIMER 7R -----  
PRIMER 8F -----

3360 3370 3380 3390 3400  
.....|.....| .....|.....| .....|.....| .....|.....| .....|.....|  
Wuhan-Hu-1 AGACAACACA TTTGTGCTG GTA ACTGTGA TTTGTAATA GGAATTGTCA  
B.1.1.7 AGACAACACA TTTGTGCTG GTA ACTGTGA TTTGTAATA GGAATTGTCA  
B.1.351 AGACAACACA TTTGTGCTG GTA ACTGTGA TTTGTAATA GGAATTGTCA  
P.1 AGACAACACA TTTGTGCTG GTA ACTGTGA TTTGTAATA GGAATTGTCA  
B.1.617 AGACAACACA TTTGTGCTG GTA ACTGTGA TTTGTAATA GGAATTGTCA  
PRIMER 1F -----  
PRIMER 1R -----



PRIMER 2F -----  
 PRIMER 2R -----  
 PRIMER 3F -----  
 PRIMER 3R -----  
 PRIMER 4F -----  
 PRIMER 4R -----  
 PRIMER 5F -----  
 PRIMER 5R -----  
 PRIMER 6F -----  
 PRIMER 6R -----  
 PRIMER 7R -----  
 PRIMER 8F -----

3410 3420 3430 3440 3450  
 .....|.....| .....|.....| .....|.....| .....|.....| .....|.....|  
 Wuhan-Hu-1 ACAACACAGT TTATGATCCT TTGCAACCTG AATTAGACTC ATTCAAGGAG  
 B.1.1.7 ACAACACAGT TTATGATCCT TTGCAACCTG AATTAGACTC ATTCAAGGAG  
 B.1.351 ACAACACAGT TTATGATCCT TTGCAACCTG AATTAGACTC ATTCAAGGAG  
 P.1 ACAACACAGT TTATGATCCT TTGCAACCTG AATTAGACTC ATTCAAGGAG  
 B.1.617 ACAACACAGT TTATGATCCT TTGCAACCTG AATTAGACTC ATTCAAGGAG  
 PRIMER 1F -----  
 PRIMER 1R -----  
 PRIMER 2F -----  
 PRIMER 2R -----  
 PRIMER 3F -----  
 PRIMER 3R -----  
 PRIMER 4F -----  
 PRIMER 4R -----  
 PRIMER 5F -----  
 PRIMER 5R -----  
 PRIMER 6F -----  
 PRIMER 6R -----  
 PRIMER 7R -----  
 PRIMER 8F -----

3460 3470 3480 3490 3500  
 .....|.....| .....|.....| .....|.....| .....|.....| .....|.....|  
 Wuhan-Hu-1 GAGTTAGATA AATATTTTAA GAATCATACA TCACCAGATG TTGATTTAGG  
 B.1.1.7 GAGTTAGATA AATATTTTAA GAATCATACA TCACCAGATG TTGATTTAGG  
 B.1.351 GAGTTAGATA AATATTTTAA GAATCATACA TCACCAGATG TTGATTTAGG  
 P.1 GAGTTAGATA AATATTTTAA GAATCATACA TCACCAGATG TTGATTTAGG  
 B.1.617 GAGTTAGATA AATATTTTAA GAATCATACA TCACCAGATG TTGATTTAGG  
 PRIMER 1F -----  
 PRIMER 1R -----  
 PRIMER 2F -----  
 PRIMER 2R -----  
 PRIMER 3F -----  
 PRIMER 3R -----  
 PRIMER 4F -----  
 PRIMER 4R -----  
 PRIMER 5F -----  
 PRIMER 5R -----  
 PRIMER 6F -----  
 PRIMER 6R -----  
 PRIMER 7R -----  
 PRIMER 8F -----

3510 3520 3530 3540 3550  
 .....|.....| .....|.....| .....|.....| .....|.....| .....|.....|  
 Wuhan-Hu-1 TGACATCTCT GGCATTAATG CTTTCAGTTGT AAACATTCAA AAAGAAAATTG  
 B.1.1.7 TGACATCTCT GGCATTAATG CTTTCAGTTGT AAACATTCAA AAAGAAAATTG  
 B.1.351 TGACATCTCT GGCATTAATG CTTTCAGTTGT AAACATTCAA AAAGAAAATTG

P.1 TGACATCTCT GGCATTAATG CTTCAATTTGT AAACATTCAA AAAGAAATTG  
 B.1.617 TGACATCTCT GGCATTAATG CTTCAATTTGT AAACATTCAA AAAGAAATTG  
 PRIMER 1F -----  
 PRIMER 1R -----  
 PRIMER 2F -----  
 PRIMER 2R -----  
 PRIMER 3F -----  
 PRIMER 3R -----  
 PRIMER 4F -----  
 PRIMER 4R -----  
 PRIMER 5F -----  
 PRIMER 5R -----  
 PRIMER 6F -----  
 PRIMER 6R -----  
 PRIMER 7R -----  
 PRIMER 8F -----

3560 3570 3580 3590 3600

.....|.....| .....|.....| .....|.....| .....|.....| .....|.....|  
 Wuhan-Hu-1 ACCGCCTCAA TGAGGTTGCC AAGAATTTAA ATGAATCTCT CATCGATCTC  
 B.1.1.7 ACCGCCTCAA TGAGGTTGCC AAGAATTTAA ATGAATCTCT CATCGATCTC  
 B.1.351 ACCGCCTCAA TGAGGTTGCC AAGAATTTAA ATGAATCTCT CATCGATCTC  
 P.1 ACCGCCTCAA TGAGGTTGCC AAGAATTTAA ATGAATCTCT CATCGATCTC  
 B.1.617 ACCGCCTCAA TGAGGTTGCC AAGAATTTAA ATGAATCTCT CATCGATCTC  
 PRIMER 1F -----  
 PRIMER 1R -----  
 PRIMER 2F -----  
 PRIMER 2R -----  
 PRIMER 3F -----  
 PRIMER 3R -----  
 PRIMER 4F -----  
 PRIMER 4R -----  
 PRIMER 5F -----  
 PRIMER 5R -----  
 PRIMER 6F -----  
 PRIMER 6R -----  
 PRIMER 7R -----  
 PRIMER 8F -----

3610 3620 3630 3640 3650

.....|.....| .....|.....| .....|.....| .....|.....| .....|.....|  
 Wuhan-Hu-1 CAAGAACTTG GAAAGTATGA GCAGTATATA AAATGGCCAT GGTACATTTG  
 B.1.1.7 CAAGAACTTG GAAAGTATGA GCAGTATATA AAATGGCCAT GGTACATTTG  
 B.1.351 CAAGAACTTG GAAAGTATGA GCAGTATATA AAATGGCCAT GGTACATTTG  
 P.1 CAAGAACTTG GAAAGTATGA GCAGTATATA AAATGGCCAT GGTACATTTG  
 B.1.617 CAAGAACTTG GAAAGTATGA GCAGTATATA AAATGGCCAT GGTACATTTG  
 PRIMER 1F -----  
 PRIMER 1R -----  
 PRIMER 2F -----  
 PRIMER 2R -----  
 PRIMER 3F -----  
 PRIMER 3R -----  
 PRIMER 4F -----  
 PRIMER 4R -----  
 PRIMER 5F -----  
 PRIMER 5R -----  
 PRIMER 6F -----  
 PRIMER 6R -----  
 PRIMER 7R -----  
 PRIMER 8F -----

3660 3670 3680 3690 3700

|            |             |             |             |             |             |
|------------|-------------|-------------|-------------|-------------|-------------|
|            | ..... ..... | ..... ..... | ..... ..... | ..... ..... | ..... ..... |
| Wuhan-Hu-1 | GCTAGGTTTT  | ATAGCTGGCT  | TGATTGCCAT  | AGTAATGGTG  | ACAATTATGC  |
| B.1.1.7    | GCTAGGTTTT  | ATAGCTGGCT  | TGATTGCCAT  | AGTAATGGTG  | ACAATTATGC  |
| B.1.351    | GCTAGGTTTT  | ATAGCTGGCT  | TGATTGCCAT  | AGTAATGGTG  | ACAATTATGC  |
| P.1        | GCTAGGTTTT  | ATAGCTGGCT  | TGATTGCCAT  | AGTAATGGTG  | ACAATTATGC  |
| B.1.617    | GCTAGGTTTT  | ATAGCTGGCT  | TGATTGCCAT  | AGTAATGGTG  | ACAATTATGC  |
| PRIMER 1F  | -----       | -----       | -----       | -----       | -----       |
| PRIMER 1R  | -----       | -----       | -----       | -----       | -----       |
| PRIMER 2F  | -----       | -----       | -----       | -----       | -----       |
| PRIMER 2R  | -----       | -----       | -----       | -----       | -----       |
| PRIMER 3F  | -----       | -----       | -----       | -----       | -----       |
| PRIMER 3R  | -----       | -----       | -----       | -----       | -----       |
| PRIMER 4F  | -----       | -----       | -----       | -----       | -----       |
| PRIMER 4R  | -----       | -----       | -----       | -----       | -----       |
| PRIMER 5F  | -----       | -----       | -----       | -----       | -----       |
| PRIMER 5R  | -----       | -----       | -----       | -----       | -----       |
| PRIMER 6F  | -----       | -----       | -----       | -----       | -----       |
| PRIMER 6R  | -----       | -----       | -----       | -----       | -----       |
| PRIMER 7R  | -----       | -----       | -----       | -----       | -----       |
| PRIMER 8F  | -----       | -----       | -----       | -----       | -----       |

|            |             |             |             |             |             |
|------------|-------------|-------------|-------------|-------------|-------------|
|            | 3710        | 3720        | 3730        | 3740        | 3750        |
|            | ..... ..... | ..... ..... | ..... ..... | ..... ..... | ..... ..... |
| Wuhan-Hu-1 | TTTGCTGTAT  | GACCAGTTGC  | TGTAGTTGTC  | TCAAGGGCTG  | TTGTTCTTGT  |
| B.1.1.7    | TTTGCTGTAT  | GACCAGTTGC  | TGTAGTTGTC  | TCAAGGGCTG  | TTGTTCTTGT  |
| B.1.351    | TTTGCTGTAT  | GACCAGTTGC  | TGTAGTTGTC  | TCAAGGGCTG  | TTGTTCTTGT  |
| P.1        | TTTGCTGTAT  | GACCAGTTGC  | TGTAGTTGTC  | TCAAGGGCTG  | TTGTTCTTGT  |
| B.1.617    | TTTGCTGTAT  | GACCAGTTGC  | TGTAGTTGTC  | TCAAGGGCTG  | TTGTTCTTGT  |
| PRIMER 1F  | -----       | -----       | -----       | -----       | -----       |
| PRIMER 1R  | -----       | -----       | -----       | -----       | -----       |
| PRIMER 2F  | -----       | -----       | -----       | -----       | -----       |
| PRIMER 2R  | -----       | -----       | -----       | -----       | -----       |
| PRIMER 3F  | -----       | -----       | -----       | -----       | -----       |
| PRIMER 3R  | -----       | -----       | -----       | -----       | -----       |
| PRIMER 4F  | -----       | -----       | -----       | -----       | -----       |
| PRIMER 4R  | -----       | -----       | -----       | -----       | -----       |
| PRIMER 5F  | -----       | -----       | -----       | -----       | -----       |
| PRIMER 5R  | -----       | -----       | -----       | -----       | -----       |
| PRIMER 6F  | -----       | -----       | -----       | -----       | -----       |
| PRIMER 6R  | -----       | -----       | -----       | -----       | -----       |
| PRIMER 7R  | -----       | -----       | -----       | -----       | -----       |
| PRIMER 8F  | -----       | -----       | -----       | -----       | -----       |

|            |             |             |             |             |             |
|------------|-------------|-------------|-------------|-------------|-------------|
|            | 3760        | 3770        | 3780        | 3790        | 3800        |
|            | ..... ..... | ..... ..... | ..... ..... | ..... ..... | ..... ..... |
| Wuhan-Hu-1 | GGATCCTGCT  | GCAAATTTGA  | TGAAGACGAC  | TCTGAGCCAG  | TGCTCAAAGG  |
| B.1.1.7    | GGATCCTGCT  | GCAAATTTGA  | TGAAGACGAC  | TCTGAGCCAG  | TGCTCAAAGG  |
| B.1.351    | GGATCCTGCT  | GCAAATTTGA  | TGAAGACGAC  | TCTGAGCCAG  | TGCTCAAAGG  |
| P.1        | GGATCCTGCT  | GCAAATTTGA  | TGAAGACGAC  | TCTGAGCCAG  | TGCTCAAAGG  |
| B.1.617    | GGATCCTGCT  | GCAAATTTGA  | TGAAGACGAC  | TCTGAGCCAG  | TGCTCAAAGG  |
| PRIMER 1F  | -----       | -----       | -----       | -----       | -----       |
| PRIMER 1R  | -----       | -----       | -----       | -----       | -----       |
| PRIMER 2F  | -----       | -----       | -----       | -----       | -----       |
| PRIMER 2R  | -----       | -----       | -----       | -----       | -----       |
| PRIMER 3F  | -----       | -----       | -----       | -----       | -----       |
| PRIMER 3R  | -----       | -----       | -----       | -----       | -----       |
| PRIMER 4F  | -----       | -----       | -----       | -----       | -----       |
| PRIMER 4R  | -----       | -----       | -----       | -----       | -----       |
| PRIMER 5F  | -----       | -----       | -----       | -----       | -----       |
| PRIMER 5R  | -----       | -----       | -----       | -----       | -----       |
| PRIMER 6F  | -----       | -----       | -----       | -----       | -----       |
| PRIMER 6R  | -----       | -----       | -----       | -----       | GG          |

PRIMER 7R -----  
PRIMER 8F -----

|            | 3810        | 3820        |       |
|------------|-------------|-------------|-------|
|            | ..... ..... | ..... ..... | ..... |
| Wuhan-Hu-1 | AGTCAAATTA  | CATTACACAT  | AA    |
| B.1.1.7    | AGTCAAATTA  | CATTACACAT  | AA    |
| B.1.351    | AGTCAAATTA  | CATTACACAT  | AA    |
| P.1        | AGTCAAATTA  | CATTACACAT  | AA    |
| B.1.617    | AGTCAAATTA  | CATTACACAT  | AA    |
| PRIMER 1F  | -----       | -----       | --    |
| PRIMER 1R  | -----       | -----       | --    |
| PRIMER 2F  | -----       | -----       | --    |
| PRIMER 2R  | -----       | -----       | --    |
| PRIMER 3F  | -----       | -----       | --    |
| PRIMER 3R  | -----       | -----       | --    |
| PRIMER 4F  | -----       | -----       | --    |
| PRIMER 4R  | -----       | -----       | --    |
| PRIMER 5F  | -----       | -----       | --    |
| PRIMER 5R  | -----       | -----       | --    |
| PRIMER 6F  | -----       | -----       | --    |
| PRIMER 6R  | AGTCAAATTA  | CATTACACAT  | AAAC  |
| PRIMER 7R  | -----       | -----       | --    |
| PRIMER 8F  | -----       | -----       | --    |
